# Supplementary material
Source: PubMed Central journal article supplement (PMC3982689)
Supplement: 5c14d85fbc99cf84eca58aae38e60110_genetics.114.161364-5.pdf [file 5c14d85fbc99cf84eca58aae38e60110_genetics.114.161364-5.pdf]

**File S6**

**Proof of Result 6**

In view of (33), the symmetric equilibrium  $(\bar{x}, \bar{y})$  is internally stable if

$$\frac{(1 - 2\mu)^2(1 + s)^2}{(1 + s\bar{x})^2[1 + s(1 - \tilde{x})]^2} < 1, \quad (S6.1)$$

as  $\bar{x} = \bar{y}$  and  $\tilde{x} = \tilde{y}$ , where, by (S5.1)

$$\tilde{x} = \frac{[(s + 1)(1 - m_B) - m_B]\bar{x} + m_B}{s\bar{x} + 1}. \quad (S6.2)$$

Thus

$$1 + s(1 - \tilde{x}) = (1 + s) - s \cdot \frac{[(1 + s) - m_B(2 + s)]\bar{x} + m_B}{s\bar{x} + 1}. \quad (S6.3)$$

Hence

$$(1 + s\bar{x})[1 + s(1 - \tilde{x})] = (1 + s)(1 + s\bar{x}) - s[(1 + s) - m_B(s + 2)]\bar{x} - sm_B, \quad (S6.4)$$

or

$$(1 + s\bar{x})[1 + s(1 - \tilde{x})] = (1 + s) + sm_B[(s + 2)\bar{x} - 1]. \quad (S6.5)$$

For condition (S6.1) to be satisfied, since  $(1 + s\bar{x})[1 + s(1 - \tilde{x})] > 0$ , it is sufficient that

$$(1 + s) + sm_B[(s + 2)\bar{x} - 1] > (1 + s), \quad (S6.6)$$

or that  $\bar{x} > \frac{1}{s+2}$ . But

$$R\left(\frac{1}{s+2}\right) = \frac{s}{(s+2)^2} + [2 - m_B(s+2)]\frac{1}{s+2} - (1 - m_B), \quad (S6.7)$$

or

$$R\left(\frac{1}{s+2}\right) = \frac{s}{(s+2)^2} + \frac{2}{s+2} - 1 = -\frac{s(1+s)}{(s+2)^2} < 0. \quad (S6.8)$$

Thus  $R(\frac{1}{s+2}) < 0$  and  $R(1) > 0$ , and so  $\bar{x} > \frac{1}{s+2}$  as desired.
