# Supplementary material
Source: PubMed Central journal article supplement (PMC3982689)
Supplement: 5f3eb94f328063d0d37750f3928b9ef6_genetics.114.161364-11.pdf [file 5f3eb94f328063d0d37750f3928b9ef6_genetics.114.161364-11.pdf]

**File S1**  
**Proof of Result 1**

1. When  $y = x$ , the mean fitnesses in the two demes  $E_x$  and  $E_y$  are equal:

$$w_x = 1 + sx = 1 + sy = w_y, \quad (S1.1)$$

and, from (8), the equilibrium equation is, (with  $\mu = \mu_B$ ),

$$(1 + sx)x = (1 - m)[(1 - \mu)(1 + s)x + \mu(1 - x)] + m[(1 - \mu)(1 - x) + \mu(1 + s)x]. \quad (S1.2)$$

Thus

$$(1 + sx)x = (1 + s)x[(1 - m)(1 - \mu) + m\mu] + (1 - x)[\mu(1 - m) + m(1 - \mu)], \quad (S1.3)$$

or

$$x + sx^2 = (1 + s)x[1 - m - \mu + 2m\mu] + (1 - x)[m + \mu - 2m\mu]. \quad (S1.4)$$

This is equivalent to

$$Q(x) = sx^2 + [(s + 2)(m + \mu - 2m\mu) - s]x - (m + \mu - 2m\mu) = 0. \quad (S1.5)$$

Now, as  $0 < m, \mu < 1$ , we have

$$(m + \mu - 2m\mu) = m(1 - \mu) + \mu(1 - m) > 0. \quad (S1.6)$$

Therefore

$$Q(0) = -(m + \mu - 2m\mu) < 0 \quad (S1.7)$$

and

$$Q(1) = (s + 1)(m + \mu - 2m\mu) > 0. \quad (S1.8)$$

As  $Q(\pm\infty) > 0$ , we conclude that the equation (S1.5) has a unique root  $x^*$  with  $0 < x^* < 1$ . Thus there is a unique symmetric polymorphism  $(\mathbf{x}^*, \mathbf{y}^*)$ , given by (13).

2. Near the equilibrium  $(\mathbf{x}^*, \mathbf{y}^*)$ , on the boundary where only  $B$  is present,  $(z - x)$  is small, and from (10), the internal local stability of  $(\mathbf{x}^*, \mathbf{y}^*)$  in the boundary is determined by the factor

$$C^* = \frac{(1 - 2\mu)(1 + s)}{(1 + sx^*)(1 + sz^*)}. \quad (S1.9)$$

As  $x^* = z^*$ ,  $C^* < 1$  if  $(1+s) < (1+sx^*)^2$ , and as  $s > 0$  this is true if  $s(x^*)^2 + 2x^* > 1$ .

From the equilibrium equation (S1.5), as  $Q(x^*) = 0$  we have

$$\begin{aligned} s(x^*)^2 + 2x^* &= -[(s+2)(m+\mu-2m\mu) - s]x^* + (m+\mu-2m\mu) + 2x^* \\ &= -(s+2)(m+\mu-2m\mu-1)x^* + (m+\mu-2m\mu). \end{aligned} \quad (S1.10)$$

Thus  $s(x^*)^2 + 2x^* > 1$  if and only if

$$(s+2)(1-m-\mu+2m\mu)x^* > (1-m-\mu+2m\mu). \quad (S1.11)$$

But  $(1-m-\mu+2m\mu) = (1-m)(1-\mu) + m\mu > 0$  as  $0 < m, \mu < 1$ , and so  $C^* < 1$  provided  $x^* > \frac{1}{s+2}$ . As  $Q(1) > 0$  and  $Q(x^*) = 0$ , it is sufficient to show that  $Q(\frac{1}{s+2}) < 0$ . Indeed

$$\begin{aligned} Q\left(\frac{1}{s+2}\right) &= \frac{s}{(s+2)^2} + [(s+2)(m+\mu-2m\mu) - s]\frac{1}{s+2} - (m+\mu-2m\mu) \\ &= \frac{s}{(s+2)^2} - \frac{s}{s+2} = -\frac{s(s+1)}{(s+2)^2} < 0. \end{aligned} \quad (S1.12)$$

3. We compute  $Q(\frac{1}{2})$  using (14),

$$Q\left(\frac{1}{2}\right) = \frac{s}{4} + \frac{1}{2}[(s+2)(m+\mu-2m\mu) - s] - (m+\mu-2m\mu). \quad (S1.13)$$

In fact,

$$Q\left(\frac{1}{2}\right) = -\frac{s}{4}[1 - 2(m+\mu-2m\mu)]. \quad (S1.14)$$

But  $1 - 2(m+\mu-2m\mu) = (1-2m)(1-2\mu) > 0$  when  $0 < m, \mu < \frac{1}{2}$ , in which case  $Q(\frac{1}{2}) < 0$  and  $x^* > \frac{1}{2}$  as  $Q(1) > 0$ .

**File S2**

**Proof of Result 2**

If an asymmetric polymorphism exists, then (11) holds, namely, (with  $\mu = \mu_B$ ),

$$1 + sy = \frac{(1 - 2\mu)(1 + s)}{1 + sx}. \quad (\text{S2.1})$$

That is,

$$y = \frac{s(1 - x) - 2\mu(1 + s)}{s(1 + sx)}, \quad 1 - y = \frac{s(1 + s)x + 2\mu(1 + s)}{s(1 + sx)}. \quad (\text{S2.2})$$

Substituting these relations into the equilibrium equation for  $x$  from (8), we find, after some simplification, that

$$x = \frac{1 - m}{1 + sx} [(1 - \mu)(1 + s)x + \mu(1 - x)] + \frac{m}{s}(sx + 2\mu + \mu s). \quad (\text{S2.3})$$

Equation (S2.3) is equivalent to the quadratic equation

$$T(x) = (1 - m)s^2x^2 - sx[s(1 - m) - \mu(s + 2)(1 - 2m)] - \mu(2m + s) = 0. \quad (\text{S2.4})$$

As  $\mu, m, s$  are positive and  $m < 1$ , we have  $T(0) < 0$  and  $T(\pm\infty) > 0$ , implying that  $T(x)$  has two real roots, one positive and one negative. Now

$$\begin{aligned} T(1) &= (1 - m)s^2 - s[s(1 - m) - \mu(s + 2)(1 - 2\mu)] - \mu(2m + s) \\ &= \mu[s(s + 2)(1 - 2m) - (2m + s)]. \end{aligned} \quad (\text{S2.5})$$

$T(1; m)$  is a linear function of  $m$  and

$$\begin{aligned} T(1; 0) &= \mu s(s + 1) > 0 \\ T(1; \frac{1}{2}) &= -\mu(2m + s) < 0 \\ T(1; m_0) &= 0. \end{aligned} \quad (\text{S2.6})$$

Hence if  $0 < m < m_0$ ,  $T(1; m) > 0$  and a unique  $0 < \hat{x} < 1$  exists such that  $T(\hat{x}) = 0$ . In order for  $\hat{x}$  to be an equilibrium, its corresponding  $\hat{y}$  should satisfy  $0 < \hat{y} < 1$ , where

$$1 - \hat{y} = \frac{1 + s}{1 + s\hat{x}} \frac{s\hat{x} + 2\mu}{s} \quad (\text{S2.7})$$

and  $0 < \hat{y} < 1$  if and only if

$$(1 + s)(s\hat{x} + 2\mu) < s(1 + s\hat{x}) \quad (\text{S2.8})$$

or

$$\hat{x} < \frac{s - 2\mu(1 + s)}{s}. \quad (S2.9)$$

So  $0 < \hat{x} < 1$  if  $0 < \mu < \mu_0 = \frac{1}{2} \frac{s}{s+1}$ , and  $[s - 2\mu(1 + s)] > 0$ . We compute  $T\left(\frac{s-2\mu(1+s)}{s}\right)$ , which equals

$$(1 - m)[s - 2\mu(1 + s)]^2 - [s - 2\mu(1 + s)][s(1 - m) - \mu(s + 2)(1 - 2m)] - \mu(2m + s). \quad (S2.10)$$

So

$$T\left(\frac{s-2\mu(1+s)}{s}\right) = 2\mu^2(1 + s)(s + 2m) + s\mu(s + 2)(1 - 2m) - \mu(2m + s). \quad (S2.11)$$

But when  $0 < m < m_0$ ,

$$T(1) = s\mu(s + 2)(1 - 2m) - \mu(2m + s) > 0, \quad (S2.12)$$

therefore  $T\left(\frac{s-2\mu(1+s)}{s}\right) > 0$ , and (S2.9) holds.

**File S3**

**Proof of Result 3**

The asymmetric equilibrium  $(\hat{x}, \hat{y})$  is determined by the solutions of the quadratic equation

$$T(x; \mu_B) = (1 - m)s^2x^2 - sx[s(1 - m) - \mu_B(s + 2)(1 - 2m)] - \mu_B(2m + s) = 0. \quad (\text{S3.1})$$

When  $\mu_B = 0$ , equation (S3.1) reduces to

$$T(x; 0) = -(1 - m)s^2x(1 - x) = 0, \quad (\text{S3.2})$$

giving the two solutions  $\hat{x} = 0$  and  $\hat{x} = 1$ . As  $T(0; \mu_B) < 0$ , when  $\mu_B > 0$  the solution  $x = 0$  shifts to a negative solution of (S3.1). Hence, when  $\mu_B$  is positive and small, the positive root  $\hat{x}(\mu_B)$  of  $T(x; \mu_B) = 0$  is close to  $x = 1$ . That is, when  $\mu_B$  is small the corresponding asymmetric equilibrium is close to the fixation of  $AB$  where  $\hat{x} = \hat{y} = 1$ . Moreover, by continuity, if  $\mu_B$  is small, their stability is the same. Near fixation of  $AB$ ,  $w = 1 - x$  and  $z = 1 - y$  are small, and up to non-linear terms, when  $\mu_B = 0$ , we have

$$\begin{aligned} w' &= \frac{1 - m}{1 + s}w + m(s + 1)z \\ z' &= \frac{m}{1 + s}w + (1 - m)(s + 1)z. \end{aligned} \quad (\text{S3.3})$$

The characteristic polynomial  $P(\lambda)$  of (S3.3) is

$$P(\lambda) = \lambda^2 - (1 - m) \left[ (1 + s) + \frac{1}{1 + s} \right] \lambda + (1 - 2m) \quad (\text{S3.4})$$

and

$$P(1) = 1 - (1 - m) \frac{(1 + s)^2 + 1}{1 + s} + 1 - 2m. \quad (\text{S3.5})$$

In fact, it can be easily seen that

$$(1 + s)P(1) = -s^2(1 - m). \quad (\text{S3.6})$$

As  $P(+\infty) > 0$  and  $P(1) < 0$ , since  $s > 0$ ,  $0 < m < 1$ ,  $P(\lambda)$  has a root larger than 1. Thus, when  $\mu_B$  is small, fixation in  $AB$  is internally locally unstable and so is the asymmetric equilibrium when  $\mu_B$  is small.

**File S4**

**Proof of Result 4**

A straightforward computation shows that the  $4 \times 4$  matrix  $\mathbf{L}_{\text{ex}}$  can be written as

$$\mathbf{L}_{\text{ex}} = \begin{pmatrix} (1-m)A & (1-m)B & mC & mD \\ (1-m)D & (1-m)C & mB & mA \\ mA & mB & (1-m)C & (1-m)D \\ mD & mC & (1-m)B & (1-m)A \end{pmatrix}, \quad (\text{S4.1})$$

where

$$\begin{aligned} (1+sx^*)A &= (1+s)(1-\mu_b) + r(1-x^*)[(s+2)\mu_b - (s+1)] \\ (1+sx^*)B &= (1+s)rx^* + \mu_b[1 - (s+2)rx^*] \\ (1+sx^*)C &= (1-\mu_b) + rx^*[(s+2)\mu_b - 1] \\ (1+sx^*)D &= (1+s)\mu_b + r(1-x^*)[1 - (s+2)\mu_b]. \end{aligned} \quad (\text{S4.2})$$

Observe that “formally”  $A, B, C, D$  are linear in  $\mu_b$ . Let  $A_0$  be the value of  $A$  when  $\mu_b = 0$  and  $A_1$  be its value when  $\mu_b = 1$ . Similarly we have  $B_0, B_1, C_0, C_1, D_0, D_1$ . In fact,

$$\begin{aligned} (1+sx^*)A_0 &= (1+s)[1 - r(1-x^*)] \\ (1+sx^*)A_1 &= r(1-x^*) \\ (1+sx^*)B_0 &= (1+s)rx^* \\ (1+sx^*)B_1 &= 1 - rx^* \\ (1+sx^*)C_0 &= 1 - rx^* \\ (1+sx^*)C_1 &= (1+s)rx^* \\ (1+sx^*)D_0 &= r(1-x^*) \\ (1+sx^*)D_1 &= (1+s)[1 - r(1-x^*)]. \end{aligned} \quad (\text{S4.3})$$

As  $0 < r < 1$ ,  $0 < x^* < 1$  we have  $A_i, B_i, C_i, D_i$  positive for  $i = 0, 1$ . Hence, as  $A, B, C, D$  are linear in  $\mu_b$ ,  $A, B, C, D$  are all positive for  $0 < \mu_b < 1$ . Moreover we have

$$C_0 = B_1, \quad C_1 = B_0, \quad D_0 = A_1, \quad D_1 = A_0. \quad (\text{S4.4})$$

Let  $S(\lambda) = \det(\mathbf{L}_{\text{ex}} - \lambda\mathbf{I})$  be the characteristic polynomial of  $\mathbf{L}_{\text{ex}}$ . The structure of  $\mathbf{L}_{\text{ex}}$  given in (S4.1) entails that  $S(\lambda)$  factors into the product of two quadratic polynomials  $S_1(\lambda)$  and  $S_2(\lambda)$ :

$$S(\lambda) = S_1(\lambda)S_2(\lambda), \quad (\text{S4.5})$$

where

$$\begin{aligned} S_1(\lambda) &= \lambda^2 - \lambda[(1-m)(A+C) + m(B+D)] + (1-2m)(AC - BD) \\ S_2(\lambda) &= \lambda^2 - \lambda[(1-m)(A+C) - m(B+D)] + (1-2m)(AC - BD). \end{aligned} \quad (S4.6)$$

See Balkau and Feldman (1973) for analogous calculations with migration modification. Consider first the roots of  $S_1(\lambda) = 0$ . These are real since the discriminant of  $S_1(\lambda) = 0$  is

$$\begin{aligned} & [(1-m)(A+C) + m(B+D)]^2 - 4(1-2m)(AC - BD) = \\ & = [(1-m)(A-C) + m(B-D)]^2 + 4m(1-m)(AD + BC) + 4(1-m)^2 BD + 4m^2 AC, \end{aligned} \quad (S4.7)$$

which is positive since  $A, B, C, D$  are positive and  $0 < m < 1$ .

In addition,

$$\begin{aligned} AC - BD &= [(1-\mu_b)A_0 + \mu_b A_1] [(1-\mu_b)(C_0 + \mu_b C_1)] \\ &\quad - [(1-\mu_b)B_0 + \mu_b B_1] [(1-\mu_b)D_0 + \mu_b D_1]. \end{aligned} \quad (S4.8)$$

Since  $C_0 = B_1, C_1 = B_0, D_0 = A_1, D_1 = A_0$ , (S4.8) reduces to

$$AC - BD = (1 - 2\mu_b)(A_0 B_1 - A_1 B_0). \quad (S4.9)$$

Substituting  $A_0, A_1, B_0, B_1$  from (S4.3) we have

$$(1 + sx^*)^2 (AC - BD) = (1 - 2\mu_b)(1 + s)(1 - r). \quad (S4.10)$$

Since we assume  $0 < m, \mu_b < \frac{1}{2}$ , the two roots of  $S_1(\lambda) = 0$  are positive. Both of these roots are less than 1 if and only if  $S_1(1) > 0$  and  $S'_1(1) > 0$ .

$$S'_1(1) = 2 - [(1-m)(A+C) + m(B+D)]. \quad (S4.11)$$

As  $C_0 = B_1, C_1 = B_0, D_0 = A_1, D_1 = A_0$ , we have

$$\begin{aligned} (A+C) &= (1-\mu_b)(A_0 + C_0) + \mu_b(A_1 + C_1) \\ &= (1-\mu_b)(A_0 + C_0) + \mu_b(B_0 + D_0), \end{aligned} \quad (S4.12)$$

$$\begin{aligned} (B+D) &= (1-\mu_b)(B_0 + D_0) + \mu_b(B_1 + D_1) \\ &= (1-\mu_b)(B_0 + D_0) + \mu_b(A_0 + C_0). \end{aligned} \quad (S4.13)$$

Hence,

$$(1 - m)(A + C) + m(B + D) = (1 - m_b)(A_0 + C_0) + m_b(B_0 + D_0), \quad (S4.14)$$

where

$$m_b = m + \mu_b - 2m\mu_b. \quad (S4.15)$$

Substituting for  $A_0, B_0, C_0, D_0$ , gives

$$S'_1(1) = (1 + sx^*)^{-1} [r + rsx^* + s(1 - r)(2x^* - 1) + m_b(1 - r)(s + 2)]. \quad (S4.16)$$

Now  $s > 0$ ,  $0 < r < 1$ ,  $m_b = m(1 - \mu_b) + \mu_b(1 - m) > 0$ , and  $x^* > \frac{1}{2}$  if  $0 < m, \mu_B < \frac{1}{2}$ . Therefore  $S'(1) > 0$  provided  $0 < m, \mu_B < \frac{1}{2}$ . Using (S4.11) and (S4.16) it is easily seen that  $S(1) > 0$  if

$$(1 + sx^*)^{-2}(1 - r) \left\{ (x^*)^2 s^2 + sx^* [-s + m_b(s + 2)] - sm_b \right\} > 0. \quad (S4.17)$$

Using the equation  $Q(x^*) = 0$  from (14), we have

$$s(x^*)^2 + [(s + 2)m_B - s]x^* - m_B = 0, \quad (S4.18)$$

where

$$m_B = m + \mu_B - 2m\mu_B. \quad (S4.19)$$

Therefore (S4.17) is satisfied if and only if

$$(m_b - m_B)(1 + sx^*)^{-2}(1 - r)s[x^*(2 + s) - 1] > 0. \quad (S4.20)$$

As  $x^* > \frac{1}{2}$ , by Result 1, and  $0 < m < \frac{1}{2}$ , (S4.20) holds if and only if  $m_b > m_B$ , which is true if and only if  $\mu_b > \mu_B$ .

It is not obvious that the roots of  $S_2(\lambda) = 0$  are real. However, as the matrix  $\mathbf{L}_{\text{ex}}^*$  is positive, the Perron-Frobenius theory ensures that its largest eigenvalue in magnitude is positive. Therefore we just have to ensure that when both eigenvalues are real and positive they are less than 1; when they are real, both are positive or both are negative



since  $(1 - 2m)(1 - 2\mu_b)(AC - BD)$  is positive for  $0 < m, \mu_b < \frac{1}{2}$ . The conditions for this are that both  $S_2(1)$  and  $S'_2(1)$  are positive. But

$$\begin{aligned} S_2(1) &= 1 - [(1 - m)(A + C) - m(B + D)] + (1 - 2m)(AC - BD) \\ &> 1 - [(1 - m)(A + C) + m(B + D)] + (1 - 2m)(AC - BD) = S_1(1), \end{aligned} \tag{S4.21}$$

and  $S_1(1) > 0$  when  $0 < m, \mu_b < \frac{1}{2}$  and  $\mu_b > \mu_B$ , so also  $S_2(1) > 0$ . Similarly

$$\begin{aligned} S'_2(1) &= 2 - [(1 - m)(A + C) - m(B + D)] \\ &> 2 - [(1 - m)(A + C) + m(B + D)] = S'_1(1). \end{aligned} \tag{S4.22}$$

Thus, when  $S'_1(1) > 0$  also  $S'_2(1) > 0$ .

**File S5**

**Proof of Result 5**

At a symmetric equilibrium  $y = x$ , and also, by (32),  $\tilde{y} = \tilde{x}$ . Thus (30) and (31) imply that

$$\tilde{x} = \frac{[(s+1)(1-m_B) - m_B]x + m_B}{sx + 1} \quad (S5.1)$$

and

$$x = \frac{[(1-m_B) - m_B(s+1)]\tilde{x} + m_B(1+s)}{(1+s) - s\tilde{x}}. \quad (S5.2)$$

Substituting (S5.1) into (S5.2) gives the quadratic equation

$$(s+2)m_B \{sx^2 + [2 - m_B(s+2)]x - (1 - m_B)\} = 0. \quad (S5.3)$$

As  $0 < m, \mu_B < 1$ ,  $s > 0$  and  $m_B = m(1 - \mu_B) + \mu_B(1 - m) > 0$ ,  $x$  satisfies the equation  $R(x) = 0$  with  $R(x)$  given in (36). As  $0 < m_B < 1$  we have  $R(0) < 0$ , and as  $R(\pm\infty) > 0$ ,  $R(x) = 0$  has two real roots, one positive and one negative. Observe that

$$R(1) = s + [2 - m_B(s+2)] - (1 - m_B) = (1 - m_B)(s+1) > 0 \quad (S5.4)$$

and

$$R\left(\frac{1}{2}\right) = \frac{s}{4} + \frac{1}{2} \cdot [2 - m_B(s+2)] - (1 - m_B) = \frac{s}{4}(1 - 2m)(1 - 2\mu_B) \quad (S5.5)$$

as  $1 - 2m_B = 1 - 2m - 2\mu_B + 4m\mu_B = (1 - 2m)(1 - 2\mu_B)$ . Therefore when  $0 < m, \mu_B < \frac{1}{2}$  we have  $R(\frac{1}{2}) > 0$  and  $0 < \bar{x} < \frac{1}{2}$ .

**File S6**

**Proof of Result 6**

In view of (33), the symmetric equilibrium  $(\bar{x}, \bar{y})$  is internally stable if

$$\frac{(1 - 2\mu)^2(1 + s)^2}{(1 + s\bar{x})^2[1 + s(1 - \tilde{x})]^2} < 1, \quad (S6.1)$$

as  $\bar{x} = \bar{y}$  and  $\tilde{x} = \tilde{y}$ , where, by (S5.1)

$$\tilde{x} = \frac{[(s + 1)(1 - m_B) - m_B]\bar{x} + m_B}{s\bar{x} + 1}. \quad (S6.2)$$

Thus

$$1 + s(1 - \tilde{x}) = (1 + s) - s \cdot \frac{[(1 + s) - m_B(2 + s)]\bar{x} + m_B}{s\bar{x} + 1}. \quad (S6.3)$$

Hence

$$(1 + s\bar{x})[1 + s(1 - \tilde{x})] = (1 + s)(1 + s\bar{x}) - s[(1 + s) - m_B(s + 2)]\bar{x} - sm_B, \quad (S6.4)$$

or

$$(1 + s\bar{x})[1 + s(1 - \tilde{x})] = (1 + s) + sm_B[(s + 2)\bar{x} - 1]. \quad (S6.5)$$

For condition (S6.1) to be satisfied, since  $(1 + s\bar{x})[1 + s(1 - \tilde{x})] > 0$ , it is sufficient that

$$(1 + s) + sm_B[(s + 2)\bar{x} - 1] > (1 + s), \quad (S6.6)$$

or that  $\bar{x} > \frac{1}{s+2}$ . But

$$R\left(\frac{1}{s+2}\right) = \frac{s}{(s+2)^2} + [2 - m_B(s+2)]\frac{1}{s+2} - (1 - m_B), \quad (S6.7)$$

or

$$R\left(\frac{1}{s+2}\right) = \frac{s}{(s+2)^2} + \frac{2}{s+2} - 1 = -\frac{s(1+s)}{(s+2)^2} < 0. \quad (S6.8)$$

Thus  $R(\frac{1}{s+2}) < 0$  and  $R(1) > 0$ , and so  $\bar{x} > \frac{1}{s+2}$  as desired.

**File S7**

**Proof of Result 7**

As the transformation  $T$  of the population state is  $T = T_2 \circ T_1$ , where  $T_i$  corresponds to phase  $i$ , with selection of type  $i$ , for  $i = 1, 2$ , and as  $\tilde{\mathbf{x}} = T_1 \bar{\mathbf{x}}$ ,  $\bar{\mathbf{x}} = T_2 \tilde{\mathbf{x}}$ , following the analysis for the case without cycles, the linear approximation matrix  $\mathbf{L}_{\text{ex}}$  becomes

$$\mathbf{L}_{\text{ex}} = \mathbf{L}_{\text{ex}}^2 \cdot \mathbf{L}_{\text{ex}}^1, \quad (\text{S7.1})$$

where, as in (S4.1) and (S4.2), we have

$$\mathbf{L}_{\text{ex}}^1 = \begin{pmatrix} (1-m)\bar{A} & (1-m)\bar{B} & m\bar{C} & m\bar{D} \\ (1-m)\bar{D} & (1-m)\bar{C} & m\bar{B} & m\bar{A} \\ m\bar{A} & m\bar{B} & (1-m)\bar{C} & (1-m)\bar{D} \\ m\bar{D} & m\bar{C} & (1-m)\bar{B} & (1-m)\bar{A} \end{pmatrix}, \quad (\text{S7.2})$$

$$\mathbf{L}_{\text{ex}}^2 = \begin{pmatrix} (1-m)\tilde{A} & (1-m)\tilde{B} & m\tilde{C} & m\tilde{D} \\ (1-m)\tilde{D} & (1-m)\tilde{C} & m\tilde{B} & m\tilde{A} \\ m\tilde{A} & m\tilde{B} & (1-m)\tilde{C} & (1-m)\tilde{D} \\ m\tilde{D} & m\tilde{C} & (1-m)\tilde{B} & (1-m)\tilde{A} \end{pmatrix}, \quad (\text{S7.3})$$

and

$$\begin{aligned} (1+s\bar{x})\bar{A} &= (1+s)(1-\mu_b) + r(1-\bar{x})[(s+2)\mu_b - (s+1)] \\ (1+s\bar{x})\bar{B} &= (1+s)r\bar{x} + \mu_b[1 - (s+2)r\bar{x}] \\ (1+s\bar{x})\bar{C} &= (1-\mu_b) + r\bar{x}[(s+2)\mu_b - 1] \\ (1+s\bar{x})\bar{D} &= (1+s)\mu_b + r(1-\bar{x})[1 - (s+2)\mu_b], \end{aligned} \quad (\text{S7.4})$$

$$\begin{aligned} [1+s(1-\tilde{x})]\tilde{A} &= (1-\mu_b) + r(1-\tilde{x})[(2+s)\mu_b - 1] \\ [1+s(1-\tilde{x})]\tilde{B} &= (1+s)\mu_b + r\tilde{x}[1 - (s+2)\mu_b] \\ [1+s(1-\tilde{x})]\tilde{C} &= (1+s)(1-\mu_b) + r\tilde{x}[(s+2)\mu_b - (s+1)] \\ [1+s(1-\tilde{x})]\tilde{D} &= \mu_b + r(1-\tilde{x})[(s+1) - (s+2)\mu_b]. \end{aligned} \quad (\text{S7.5})$$

When we multiply  $\mathbf{L}_{\text{ex}}^2$  by  $\mathbf{L}_{\text{ex}}^1$  we find that the product  $\mathbf{L}_{\text{ex}}$  has the following structure:

$$\mathbf{L}_{\text{ex}} = \begin{pmatrix} a & e & h & d \\ b & f & g & c \\ c & g & f & b \\ d & h & e & a \end{pmatrix}, \quad (\text{S7.6})$$

where

$$\begin{aligned}
a &= (1-m)^2 \tilde{A}\bar{A} + (1-m)^2 \tilde{B}\bar{D} + m^2 \tilde{C}\bar{A} + m^2 \tilde{D}\bar{D} \\
b &= (1-m)^2 \tilde{D}\bar{A} + (1-m)^2 \tilde{C}\bar{D} + m^2 \tilde{B}\bar{A} + m^2 \tilde{A}\bar{D} \\
c &= m(1-m) \left[ \tilde{A}\bar{A} + \tilde{B}\bar{D} + \tilde{C}\bar{A} + \tilde{D}\bar{D} \right] \\
d &= m(1-m) \left[ \tilde{D}\bar{A} + \tilde{C}\bar{D} + \tilde{B}\bar{A} + \tilde{A}\bar{D} \right] \\
e &= (1-m)^2 \tilde{A}\bar{B} + (1-m)^2 \tilde{B}\bar{C} + m^2 \tilde{C}\bar{B} + m^2 \tilde{D}\bar{C} \\
f &= (1-m)^2 \tilde{D}\bar{B} + (1-m)^2 \tilde{C}\bar{C} + m^2 \tilde{B}\bar{B} + m^2 \tilde{A}\bar{C} \\
g &= m(1-m) \left[ \tilde{A}\bar{B} + \tilde{B}\bar{C} + \tilde{C}\bar{B} + \tilde{D}\bar{C} \right] \\
h &= m(1-m) \left[ \tilde{D}\bar{B} + \tilde{C}\bar{C} + \tilde{B}\bar{B} + \tilde{A}\bar{C} \right].
\end{aligned} \tag{S7.7}$$

Let  $D(\lambda) = \det(\mathbf{L}_{\text{ex}} - \lambda \mathbf{I})$  be the characteristic polynomial of  $\mathbf{L}_{\text{ex}}$ . From (S7.6),  $D(\lambda)$  factors into  $2 \times 2$  determinants:

$$D(\lambda) = \begin{vmatrix} a+d-\lambda & e+h & 0 & 0 \\ b+c & f+g-\lambda & 0 & 0 \\ c & g & f-g-\lambda & b-c \\ d & h & e-h & a-d-\lambda \end{vmatrix}. \tag{S7.8}$$

Therefore  $D(\lambda)$  can be written

$$D(\lambda) = D_1(\lambda)D_2(\lambda), \tag{S7.9}$$

where

$$\begin{aligned}
D_1(\lambda) &= \lambda^2 - (a+d+f+g)\lambda + (a+d)(f+g) - (b+c)(e+h) \\
D_2(\lambda) &= \lambda^2 - (a-d+f-g)\lambda + (a-d)(f-g) - (b-c)(e-h).
\end{aligned} \tag{S7.10}$$

As  $0 < m < 1$  and  $\bar{A}, \bar{B}, \bar{C}, \bar{D}$  and  $\tilde{A}, \tilde{B}, \tilde{C}, \tilde{D}$  are all positive, the matrix  $\mathbf{L}_{\text{ex}}$  is a positive matrix and its largest eigenvalue in magnitude is positive. Observe that the discriminant of  $D_1(\lambda)$  is

$$(a+d+f+g)^2 - 4[(a+d)(f+g) - (b+c)(e+h)], \tag{S7.11}$$

which is positive and equal to

$$[(a+d) - (f+g)]^2 + 4(b+c)(e+h). \tag{S7.12}$$

In addition,  $(a+d+f+g)$  is positive. Therefore  $D_1(\lambda)$  has real roots, and its largest root in magnitude is positive. Thus this positive root is less than 1 if  $D_1(1) > 0$  and  $D_1'(1) > 0$ .

As the largest eigenvalue of  $\mathbf{L}_{\text{ex}}$  is positive, for stability of  $(\bar{\mathbf{x}}, \bar{\mathbf{y}})$  we require that if the eigenvalues associated with  $D_2(\lambda)$  are real and at least one is positive, they are both less than 1. Again the conditions for this are  $D_2(\lambda) > 0$  and  $D_2'(1) > 0$ . Observe that

$$\begin{aligned} D_1'(1) &= 2 - (a + d + f + g) \\ D_2'(1) &= 2 - (a - d + f - g) = D_1'(1) + 2(d + g) > D_1'(1). \end{aligned} \tag{S7.13}$$

In view of (S7.13), for the largest eigenvalue of  $\mathbf{L}_{\text{ex}}$  to be less than one, we require

$$D_1(1) > 0, \quad D_1'(1) > 0, \quad D_2(1) > 0. \tag{S7.14}$$

We now compute the constant terms of  $D_1(\lambda)$  and  $D_2(\lambda)$ . We already know, based on the properties of the matrices  $\mathbf{L}_{\text{ex}}^1$  and  $\mathbf{L}_{\text{ex}}^2$  that the constant terms of both  $D_1(\lambda)$  and  $D_2(\lambda)$  are the same and are equal to

$$(1 - 2m)^2 (\overline{A\overline{C}} - \overline{B\overline{D}}) (\tilde{A}\tilde{C} - \tilde{B}\tilde{D}). \tag{S7.15}$$

With the same technique used to compute (S4.10), we deduce that

$$(1 + s\bar{x})^2 (\overline{A\overline{C}} - \overline{B\overline{D}}) = (1 - 2\mu_b)(1 + s)(1 - r), \tag{S7.16}$$

and similarly

$$[1 + s(1 - \tilde{x})]^2 (\tilde{A}\tilde{C} - \tilde{B}\tilde{D}) = (1 - 2\mu_b)(1 + s)(1 - r). \tag{S7.17}$$

Therefore the constant terms of both  $D_1(\lambda)$  and  $D_2(\lambda)$  are the same and are equal to

$$(1 - 2m)^2 (1 - 2\mu_b)^2 (1 + s\bar{x})^{-2} [1 + s(1 - \tilde{x})]^{-2} (1 + s)^2 (1 - r)^2, \tag{S7.18}$$

which is positive, and so  $D_1(\lambda)$  has two positive roots. Also, as  $a, b, c, d$  are all positive,

$$\begin{aligned} D_2(1) &= 1 - (a - d + f - g) + (a - d)(f - g) - (b - c)(e - h) \\ &> 1 - (a + d + f + g) + (a + d)(f + g) - (b + c)(e + h) = D_1(1). \end{aligned} \tag{S7.19}$$

Hence for the symmetric equilibrium to be externally stable, we require that  $D_1(1)$  and  $D_1'(1)$  are both positive.

Now from (S6.5) we know that

$$(1 + s\bar{x})[1 + s(1 - \tilde{x})] = (1 + s) + sm_B[(s + 2)\bar{x} - 1]. \quad (S7.20)$$

As  $\bar{x} > \frac{1}{s+2}$  we have

$$(1 + s\bar{x})[1 + s(1 - \tilde{x})] > (1 + s). \quad (S7.21)$$

Thus the equal constant terms of  $D_1(\lambda)$  and  $D_2(\lambda)$  given in (S7.18) are positive and less than 1. As a result it is impossible for the two positive roots of  $D_1(\lambda)$  to both be larger than 1, and they are both less than 1 provided  $D_1(1) > 0$ . Hence the external stability of the symmetric equilibrium requires that

$$D_1(1) = 1 - (a + d + f + g) + (a + d)(f + g) - (b + c)(e + h) \quad (S7.22)$$

is positive (the last summand in (S7.22) is given in (S7.18)). We now compute  $a + d + f + g$ .

*Computation of  $(a + d + f + g)$*

We have

$$\begin{aligned} (a + d + f + g) &= \left[ (1 - m)^2 \tilde{A} + m^2 \tilde{C} + m(1 - m) (\tilde{B} + \tilde{D}) \right] \bar{A} \\ &\quad + \left[ (1 - m)^2 \tilde{C} + m^2 \tilde{A} + m(1 - m) (\tilde{B} + \tilde{D}) \right] \bar{C} \\ &\quad + \left[ (1 - m)^2 \tilde{B} + m^2 \tilde{D} + m(1 - m) (\tilde{A} + \tilde{C}) \right] \bar{D} \\ &\quad + \left[ (1 - m)^2 \tilde{D} + m^2 \tilde{B} + m(1 - m) (\tilde{A} + \tilde{C}) \right] \bar{B}. \end{aligned} \quad (S7.23)$$

As  $\bar{A}, \bar{B}, \bar{C}, \bar{D}$  and also  $\tilde{A}, \tilde{B}, \tilde{C}, \tilde{D}$  given in (S7.4) and (S7.5), respectively, are all linear functions of  $\mu_b$ , where  $0 \leq \mu_b \leq 1$ , we can represent them as  $\bar{A} = (1 - \mu_b)\bar{A}_0 + \mu_b\bar{A}_1$ , etc.

Hence

$$\begin{aligned} (1 + s\bar{x})\bar{A}_0 &= (1 + s)[1 - r(1 - \bar{x})] = (1 + s\bar{x})\bar{D}_1 \\ (1 + s\bar{x})\bar{B}_0 &= (1 + s)r\bar{x} = (1 + s\bar{x})\bar{C}_1 \\ (1 + s\bar{x})\bar{C}_0 &= 1 - r\bar{x} = (1 + s\bar{x})\bar{B}_1 \end{aligned} \quad (S7.24)$$

$$\begin{aligned} (1 + s\bar{x})\bar{D}_0 &= r(1 - \bar{x}) = (1 + s\bar{x})\bar{A}_1, \\ [1 + s(1 - \tilde{x})]\tilde{A}_0 &= 1 - r(1 - \tilde{x}) = [1 + s(1 - \tilde{x})]\tilde{D}_1 \\ [1 + s(1 - \tilde{x})]\tilde{B}_0 &= r\tilde{x} = [1 + s(1 - \tilde{x})]\tilde{C}_1 \\ [1 + s(1 - \tilde{x})]\tilde{C}_0 &= (1 + s)[1 - r\tilde{x}] = [1 + s(1 - \tilde{x})]\tilde{B}_1 \\ [1 + s(1 - \tilde{x})]\tilde{D}_0 &= (1 + s)r(1 - \tilde{x}) = [1 + s(1 - \tilde{x})]\tilde{A}_1. \end{aligned} \quad (S7.25)$$

Since

$$\begin{aligned} m_b &= m + \mu_b - 2m\mu_b = m(1 - \mu_b) + \mu_b(1 - m) \\ 1 - m_b &= 1 - m - \mu_b + 2m\mu_b = (1 - m)(1 - \mu_b), \end{aligned} \quad (S7.26)$$

we can write

$$\begin{aligned} (a + d + f + g) &= \left[ (1 - m)(1 - m_b)\tilde{A}_0 + (1 - m)m_b\tilde{D}_0 + m(1 - m_b)\tilde{B}_0 + m \cdot m_b\tilde{C}_0 \right] \bar{A} \\ &+ \left[ (1 - m)(1 - m_b)\tilde{C}_0 + (1 - m)m_b\tilde{B}_0 + m(1 - m_b)\tilde{D}_0 + m \cdot m_b\tilde{A}_0 \right] \bar{C} \\ &+ \left[ (1 - m)(1 - m_b)\tilde{B}_0 + (1 - m)m_b\tilde{C}_0 + m(1 - m_b)\tilde{A}_0 + m \cdot m_b\tilde{D}_0 \right] \bar{D} \\ &+ \left[ (1 - m)(1 - m_b)\tilde{D}_0 + (1 - m)m_b\tilde{A}_0 + m(1 - m_b)\tilde{C}_0 + m \cdot m_b\tilde{B}_0 \right] \bar{B}. \end{aligned} \quad (S7.27)$$

Substitute into (S7.27)

$$\begin{aligned} \bar{A} &= (1 - \mu_b)\bar{A}_0 + \mu_b\bar{D}_0, & \bar{B} &= (1 - \mu_b)\bar{B}_0 + \mu_b\bar{C}_0, \\ \bar{C} &= (1 - \mu_b)\bar{C}_0 + \mu_b\bar{B}_0, & \bar{D} &= (1 - \mu_b)\bar{D}_0 + \mu_b\bar{A}_0, \end{aligned} \quad (S7.38)$$

to obtain

$$\begin{aligned} (a + d + f + g) &= (1 - m_b)^2 \left[ \tilde{A}_0\bar{A}_0 + \tilde{B}_0\bar{D}_0 + \tilde{C}_0\bar{C}_0 + \tilde{D}_0\bar{B}_0 \right] \\ &+ m_b(1 - m_b) \left[ \left( \tilde{B}_0 + \tilde{D}_0 \right) (\bar{A}_0 + \bar{C}_0) + \left( \tilde{A}_0 + \tilde{C}_0 \right) (\bar{B}_0 + \bar{D}_0) \right] \\ &+ m_b^2 \left[ \tilde{A}_0\bar{C}_0 + \tilde{B}_0\bar{B}_0 + \tilde{C}_0\bar{A}_0 + \tilde{D}_0\bar{D}_0 \right]. \end{aligned} \quad (S7.29)$$

Equation (S7.29) can also be written as

$$\begin{aligned} (a + d + f + g) &= (1 - 2m_b) \left[ \tilde{A}_0\bar{A}_0 + \tilde{B}_0\bar{D}_0 + \tilde{C}_0\bar{C}_0 + \tilde{D}_0\bar{B}_0 \right] \\ &+ m_b \left[ \left( \tilde{B}_0 + \tilde{D}_0 \right) (\bar{A}_0 + \bar{C}_0) + \left( \tilde{A}_0 + \tilde{C}_0 \right) (\bar{B}_0 + \bar{D}_0) \right] \\ &+ m_b^2 \left[ \left( \tilde{A}_0 + \tilde{C}_0 \right) (\bar{A}_0 + \bar{C}_0) + \left( \tilde{B}_0 + \tilde{D}_0 \right) (\bar{B}_0 + \bar{D}_0) \right. \\ &\quad \left. - \left( \tilde{A}_0 + \tilde{C}_0 \right) (\bar{B}_0 + \bar{D}_0) + \left( \tilde{B}_0 + \tilde{D}_0 \right) (\bar{A}_0 + \bar{C}_0) \right], \end{aligned} \quad (S7.30)$$

or as

$$\begin{aligned} (a + d + f + g) &= (1 - 2m_b) \left[ \tilde{A}_0\bar{A}_0 + \tilde{B}_0\bar{D}_0 + \tilde{C}_0\bar{C}_0 + \tilde{D}_0\bar{B}_0 \right] \\ &+ m_b \left[ \left( \tilde{B}_0 + \tilde{D}_0 \right) (\bar{A}_0 + \bar{C}_0) + \left( \tilde{A}_0 + \tilde{C}_0 \right) (\bar{B}_0 + \bar{D}_0) \right] \\ &+ m_b^2 \left( \tilde{A}_0 + \tilde{C}_0 - \tilde{B}_0 - \tilde{D}_0 \right) (\bar{A}_0 + \bar{C}_0 - \bar{B}_0 - \bar{D}_0). \end{aligned} \quad (S7.31)$$



From (S7.24) and (S7.25),

$$\begin{aligned} (1 + s\bar{x})[1 + s(1 - \tilde{x})] \left[ \tilde{A}_0\bar{A}_0 + \tilde{B}_0\bar{D}_0 + \tilde{C}_0\bar{C}_0 + \tilde{D}_0\bar{D}_0 \right] &= \\ &= (1 + s) \left[ 2(1 - r) + r^2 \right] + r^2s(s + 1)\bar{x} - r^2s\tilde{x} - r^2s^2\bar{x}\tilde{x}, \end{aligned} \quad (S7.32)$$

$$\begin{aligned} (1 + s\bar{x})[1 + s(1 - \tilde{x})] \left[ \left( \tilde{B}_0 + \tilde{D}_0 \right) (\bar{A}_0 + \bar{C}_0) + \left( \tilde{A}_0 + \tilde{C}_0 \right) (\bar{B}_0 + \bar{D}_0) \right] &= \\ &= 2r^2(1 + s\bar{x})[1 + s(1 - \tilde{x})] + r(1 - r)(s + 2) [(s + 2) + s(\bar{x} - \tilde{x})], \end{aligned} \quad (S7.33)$$

$$\begin{aligned} (1 + s\bar{x})[1 + s(1 - \tilde{x})] \left( \tilde{A}_0 + \tilde{C}_0 - \tilde{B}_0 - \tilde{D}_0 \right) (\bar{A}_0 + \bar{C}_0 - \bar{B}_0 - \bar{D}_0) &= \\ &= (s + 2)^2 (1 - r)^2. \end{aligned} \quad (S7.34)$$

Remember that by (S7.18)

$$\begin{aligned} (1 + s\bar{x})^2 [1 + (1 - \tilde{x})]^2 [(a + d)(f + g) - (b + c)(e + h)] &= \\ &= (1 - 2m)^2 (1 - 2\mu_b)^2 (s + 1)^2 (1 - r)^2. \end{aligned} \quad (S7.35)$$

But

$$(1 - 2m)(1 - 2\mu_b) = 1 - 2(m + \mu_b - 2m\mu_b) = 1 - 2m_b. \quad (S7.36)$$

Therefore

$$\begin{aligned} (1 + s\bar{x})^2 [1 + (1 - \tilde{x})]^2 [(a + d)(f + g) - (b + c)(e + h)] &= \\ &= (1 - 2m_b)^2 (s + 1)^2 (1 - r)^2. \end{aligned} \quad (S7.37)$$

Combining all of this, we get that  $D_1(1) = 1 - (a + d + f + g) + (a + d)(f + g) - (b + c)(e + h)$ ,

which we compute as

$$\begin{aligned} 1 - (1 - 2m_b) \frac{(1 + s) \left[ 2(1 - r) + r^2 \right] + r^2s(s + 1)\bar{x} - r^2s\tilde{x} - r^2s^2\bar{x}\tilde{x}}{(1 + s\bar{x})[1 + s(1 - \tilde{x})]} & \\ - m_b \frac{2r^2(1 + s\bar{x})[1 + s(1 - \tilde{x})] + r(1 - r)(s + 2)[(s + 2) + s(\bar{x} - \tilde{x})]}{(1 + s\bar{x})[1 + s(1 - \tilde{x})]} & \\ - m_b^2 \frac{(s + 2)^2 (1 - r)^2}{(1 + s\bar{x})[1 + s(1 - \tilde{x})]} & \\ + \frac{(1 - 2m_b)^2 (s + 1)^2 (1 - r)^2}{(1 + s\bar{x})^2 [1 + s(1 - \tilde{x})]^2}. & \end{aligned} \quad (S7.38)$$

Observe that

$$r^2[(1 + s) + s(s + 1)\bar{x} - s\tilde{x} - s^2\bar{x}\tilde{x}] = r^2(1 + s\bar{x})[1 + s(1 - \tilde{x})], \quad (S7.39)$$

so (S7.38) simplifies to

$$\begin{aligned}
& 1 - r^2 - (1 - 2m_b) \frac{2(1+s)(1-r)}{(1+s\bar{x})[1+s(1-\tilde{x})]} - m_b \frac{r(1-r)(s+2)[(s+2)+s(\bar{x}-\tilde{x})]}{(1+s\bar{x})[1+s(1-\tilde{x})]} \\
& - m_b^2 \frac{(s+2)^2(1-r)^2}{(1+s\bar{x})[1+s(1-\tilde{x})]} + \frac{(1-2m_b)^2(s+1)^2(1-r)^2}{(1+s\bar{x})^2[1+s(1-\tilde{x})]^2}.
\end{aligned} \tag{S7.40}$$

Clearly  $D_1(1)$  of (S7.40) has a factor of  $(1-r)$ , and in fact

$$D_1(1) = (1-r)f(r), \tag{S7.41}$$

where  $f(r)$  is a linear function of  $r$ , for  $0 \leq r \leq 1$ . Now

$$f(1) = 2 - (1 - 2m_b) \frac{2(1+s)}{(1+s\bar{x})[1+s(1-x)]} - m_b \frac{(s+2)[(s+2)+s(\bar{x}-\tilde{x})]}{(1+s\bar{x})[1+s(1-\tilde{x})]}. \tag{S7.42}$$

Following (S6.7) we have

$$(1+s\bar{x})[1+s(1-\tilde{x})] = (1+s) + sm_B[(s+2)\bar{x} - 1]. \tag{S7.43}$$

We also have an equivalent expression for (S7.43) in terms of  $\tilde{x}$ , namely

$$(1+s\bar{x})[1+s(1-\tilde{x})] = (1+s) + sm_B[(s+1) - (s+2)\tilde{x}]. \tag{S7.44}$$

Also, whereas  $\bar{x} > \frac{1}{s+2}$ , we have  $\tilde{x} < \frac{s+1}{s+2}$ . Applying all of this to (S7.42) and using the fact that

$$(1+s\bar{x})[1+s(1-\tilde{x})] = (1+s) + \frac{1}{2}sm_B[s + (s+2)(\bar{x}-\tilde{x})], \tag{S7.45}$$

we get that

$$\begin{aligned}
(1+s\bar{x})[1+s(1-\tilde{x})]f(1) &= 2(s+1) + sm_B[s + (s+2)(\bar{x}-\tilde{x})] \\
&\quad - 2(1-2m_b)(s+1) - m_b(s+2)[(s+2)+s(\bar{x}-\tilde{x})] \\
&= s^2m_B - m_b \left[ (s+2)^2 - 4(s+1) \right] + s(s+2)(m_B - m_b)(\bar{x}-\tilde{x}) \\
&= s^2(m_B - m_b) + s(s+2)(m_B - m_b)(\bar{x}-\tilde{x}).
\end{aligned} \tag{S7.46}$$

Thus

$$(1+s\bar{x})[1+s(1-\tilde{x})]f(1) = s(m_B - m_b)[s + (s+2)(\bar{x}-\tilde{x})]. \tag{S7.47}$$

But as  $(s+2)\bar{x} > 1$ ,  $(s+2)\tilde{x} < (s+1)$ ,

$$s + (s+2)(\bar{x} - \tilde{x}) = [(s+2)\bar{x} - 1] + [(s+1) - (s+2)\tilde{x}] > 0. \quad (S7.48)$$

It follows that the sign of  $f(1)$  is the same as the sign of  $(m_B - m_b)$ .

We now compute  $f(0)$ :

$$\begin{aligned} f(0) = 1 - (1 - 2m_b) \frac{2(1+s)}{(1+s\bar{x})[1+s(1-\tilde{x})]} - m_b^2 \frac{(s+2)^2}{(1+s\bar{x})[1+s(1-\tilde{x})]} \\ + \frac{(1-2m_b)^2 (s+1)^2}{(1+s\bar{x})^2 [1+s(1-\tilde{x})]^2}. \end{aligned} \quad (S7.49)$$

Using the expression (S7.43) for the product of the two mean fitnesses, we get

$$\begin{aligned} (1+s\bar{x})^2 [1+s(1-\tilde{x})]^2 f(0) = \{(1+s) + sm_B [(s+2)\bar{x} - 1]\}^2 \\ - 2(1-2m_b)(s+1) \{(1+s) + sm_B [(s+2)\bar{x} - 1]\} \\ - m_b^2 (s+2) \{(1+s) + sm_B [(s+2)\bar{x} - 1]\} \\ + (1-2m_b)^2 (s+1)^2. \end{aligned} \quad (S7.50)$$

In (S7.50) we replace the  $\bar{x}^2$  term using the equilibrium equation (36) to give

$$\begin{aligned} (1+s\bar{x})^2 [1+s(1-\tilde{x})]^2 f(0) = (m_B - m_b)s \{ m_b s(s+1) \\ - m_B^2 (s+2)^2 + m_B [(s+1)(s+4) - m_b (s+2)^2] \\ + m_B (s+2)\bar{x} [m_B (s+2)^2 + m_b (s+2)^2 - 4(s+1)] \}. \end{aligned} \quad (S7.51)$$

The right-hand side of (S7.51) is  $(m_B - m_b)s$  multiplied by

$$m_b s(s+1) + m_B (s+2)^2 (m_B + m_b) [\bar{x}(s+2) - 1] + m_B (s+1) [(s+4) - 4\bar{x}(s+2)]. \quad (S7.52)$$

We will show that (S7.52) is always positive. In fact, (S7.52) is equal to

$$\begin{aligned} m_b s(s+1) + m_B \cdot m_b (s+2)^2 [\bar{x}(s+2) - 1] + m_B^2 (s+2)^2 [\bar{x}(s+2) - 1] \\ + m_B (s+1) [(s+4) - 4\bar{x}(s+2)]. \end{aligned} \quad (S7.53)$$

From the equilibrium equation (36) we get that

$$m_B [(s+2)\bar{x} - 1] = s\bar{x}^2 + 2\bar{x} - 1. \quad (S7.54)$$

Hence (S7.53) is equal to

$$\begin{aligned}
& m_b s(s+1) + m_B \cdot m_b (s+2)^2 [\bar{x}(s+2) - 1] + \\
& + m_B (s+2)^2 [s\bar{x}^2 + 2\bar{x} - 1] + m_B(s+1)[(s+4) - 4\bar{x}(s+2)].
\end{aligned} \tag{S7.55}$$

The last two terms have a factor  $m_B$  that multiplies

$$\begin{aligned}
& (s+1)(s+4) - (s+2)^2 + (s+2)^2 \bar{x}(2 + s\bar{x}) - 4\bar{x}(s+1)(s+2) = \\
& = s + (s+2)\bar{x}[(s+2)(2 + s\bar{x}) - 4(s+1)] \\
& = s + (s+2)\bar{x}[(s+2)s\bar{x} - 2s] \\
& = s \left[ (s+2)^2 \bar{x}^2 - 2(s+2)\bar{x} + 1 \right] = s[(s+2)\bar{x} - 1]^2,
\end{aligned} \tag{S7.56}$$

which is positive. To sum up,  $f(0)$  also has the same sign of  $(m_B - m_b)$ , and so

$$D_1(1) = (1-r)s(m_B - m_b)\Delta(r), \tag{S7.57}$$

where  $\Delta(r)$  is a linear function of  $r$  that is positive for all  $0 \leq r \leq 1$ . As  $(m_B - m_b) = (1 - 2m)(\mu_B - \mu_b)$ , this proves the following result.

**File S8**

**Proof of Result 8**

*i.* In a constant environment, the mean fitness  $w^*$  at the symmetric equilibrium  $(\bar{x}^*, \bar{y}^*)$  is  $w^* = 1 + sx^*$ , and it is a decreasing function of  $\mu_B$  if  $\frac{\partial x^*}{\partial \mu_B}$  is negative, or equivalently if  $\frac{\partial x^*}{\partial m_B}$  is negative (since  $m_B = m + \mu_B(1 - 2m)$  and  $0 \leq m < \frac{1}{2}$ ). Using the equilibrium equation (14),

$$\frac{\partial x^*}{\partial m_B} = \frac{1 - (s + 2)x^*}{2sx^* + [(s + 2)m_B - s]}. \quad (\text{S8.1})$$

As  $x^* > \frac{1}{s+2}$ , in order for  $\frac{\partial x^*}{\partial m_B}$  to be negative, it is sufficient that

$$x^* > \frac{s - m_B(s + 2)}{2s}. \quad (\text{S8.2})$$

This follows easily from the fact that  $Q(x)$  of (14) satisfies  $Q(0) < 0$ ,  $Q(x^*) = 0$ , and  $Q\left(\frac{s - m_B(s + 2)}{2s}\right) < 0$ .

*ii.* With a fitness cycle of period 2, the mean fitness  $\bar{w}$  at the symmetric equilibrium  $(\bar{x}, \bar{y})$  is

$$\bar{w} = (1 + s) + sm_B[(s + 2)\bar{x} - 1]. \quad (\text{S8.3})$$

$\bar{w}$  is an increasing function of  $\mu_B$  if  $\frac{\partial \bar{w}}{\partial \mu_B} > 0$  or equivalently if  $\frac{\partial \bar{w}}{\partial m_B} > 0$ . Now

$$\frac{\partial \bar{w}}{\partial m_B} = s[(s + 2)\bar{x} - 1] + s(s + 2)m_B \frac{\partial \bar{x}}{\partial m_B}. \quad (\text{S8.4})$$

Thus  $\frac{\partial \bar{w}}{\partial m_B} > 0$  provided  $\frac{\partial \bar{x}}{\partial m_B} > 0$ . Using the equilibrium equation  $R(x) = 0$  for  $\bar{x}$ , we have

$$\frac{\partial \bar{x}}{\partial m_B} = \frac{\bar{x}(s + 1) - 1}{2s\bar{x} + [2 - m_B(s + 2)]}. \quad (\text{S8.5})$$

Since  $[\bar{x}(s + 1) - 1] > 0$ , we conclude that  $\frac{\partial \bar{x}}{\partial m_B} > 0$  if

$$\bar{x} > \frac{m_B(s + 2) - 2}{2s}, \quad (\text{S8.6})$$

which follows from  $R(0) < 0$ ,  $R(\bar{x}) = 0$ , and  $R\left(\frac{m_B(s + 2) - 2}{2s}\right) < 0$ .

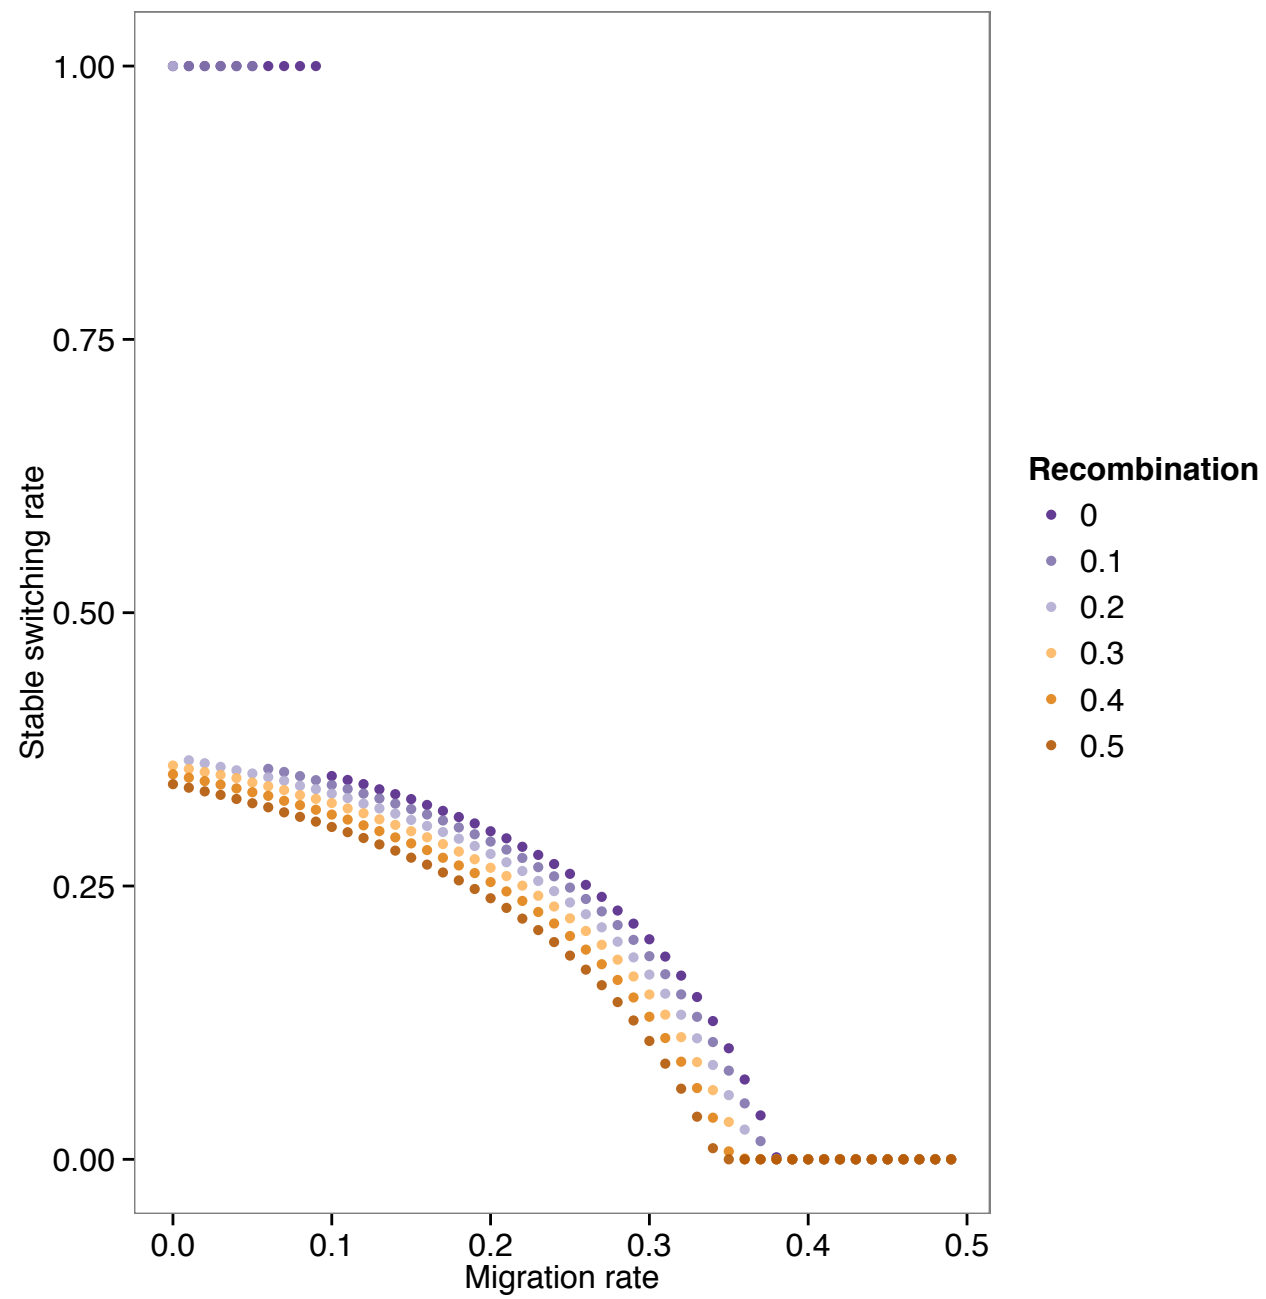

**Figure S1. The evolutionarily stable switching rate as function of migration and recombination rate,  $n = 3$ .** The symmetric selection coefficient  $s = 0.4$ . Recombination rates shown in the legend. The stable switching rate for  $n = 3$  is sensitive to the interplay of recombination and migration rates, with sudden possible discontinuities in the stable switching rate.

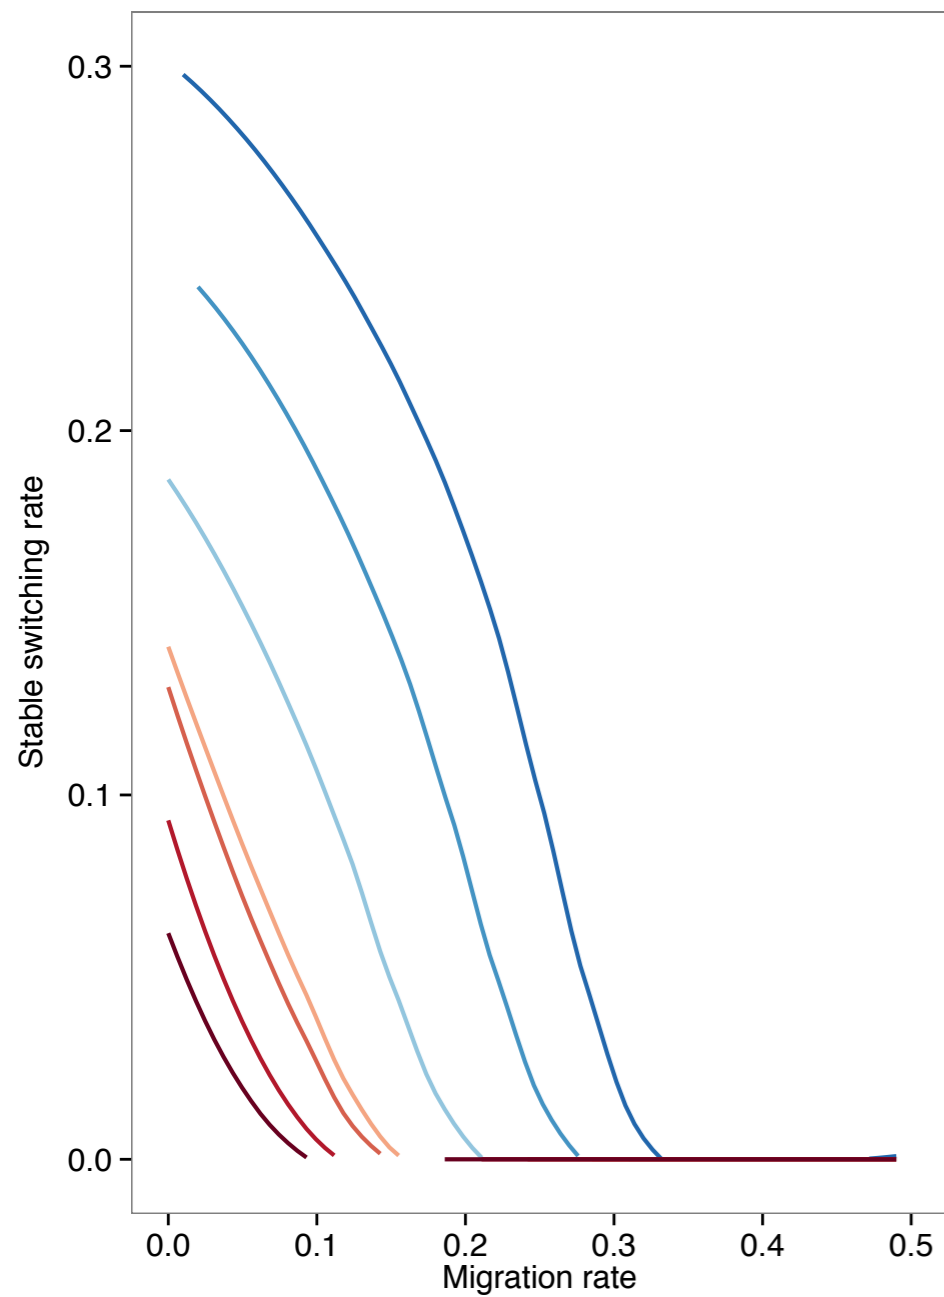

(A)

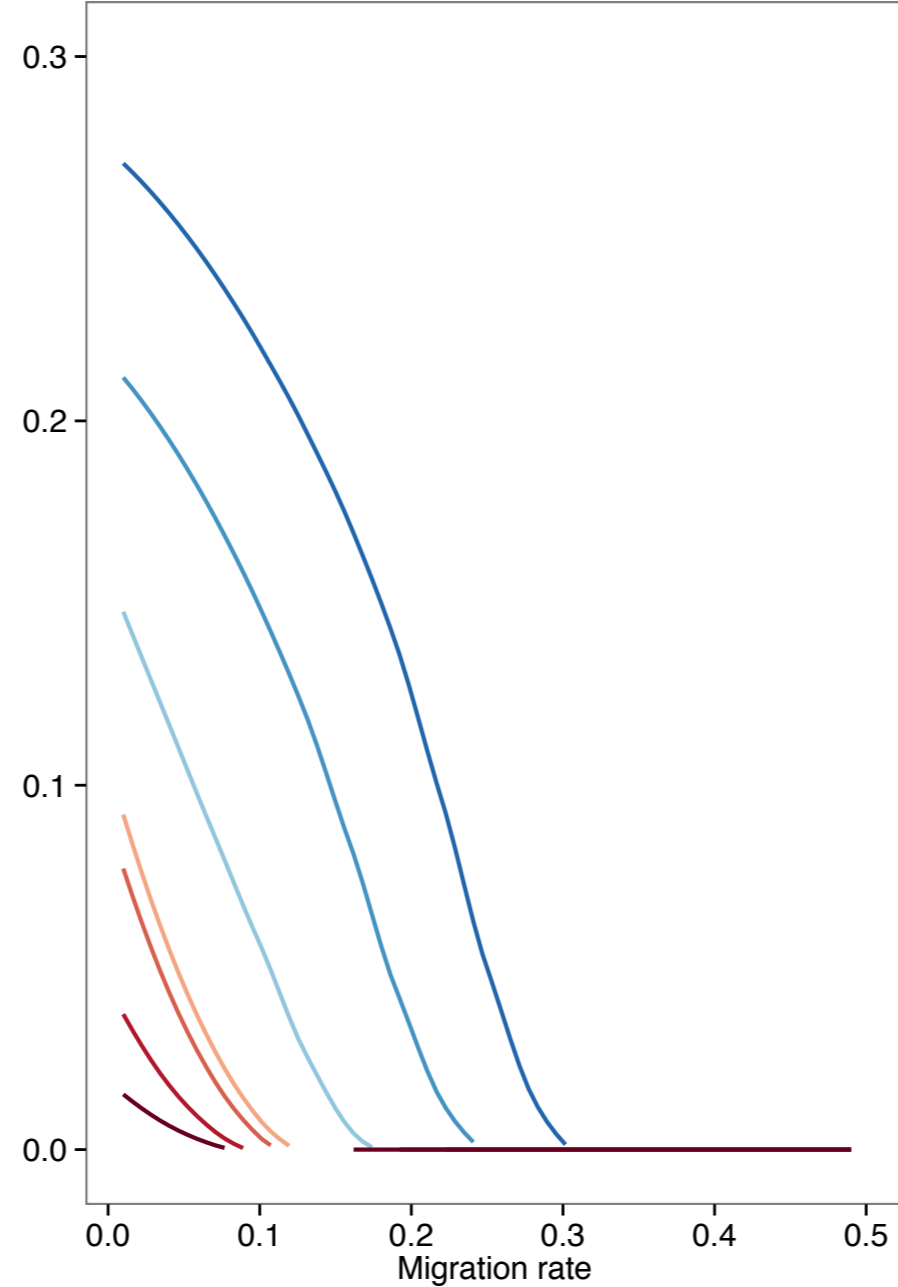

(B)

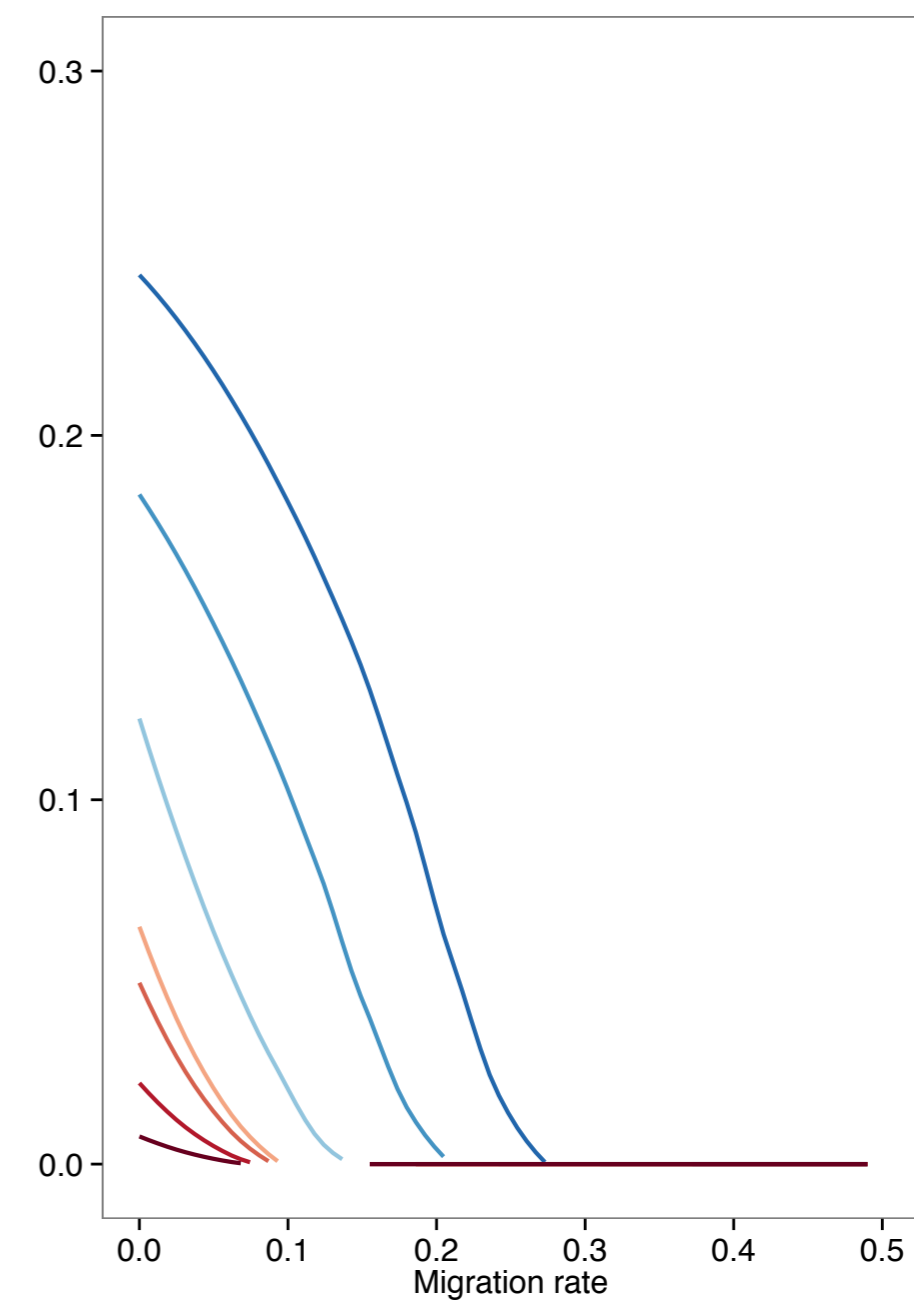

(C)

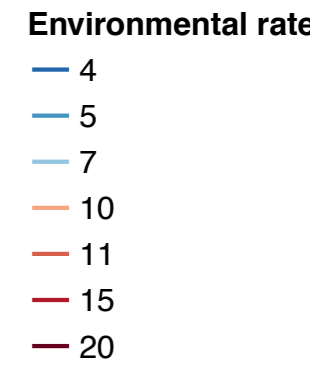



**Figure S2. The evolutionarily stable switching rate as function of migration and environmental rate of change,  $n > 3$  for different recombination rates.** The symmetric selection coefficient  $s = 0.4$ . The rate of environmental change  $n$  shown in the legend. The plotted curves represent a fit to the data using a generalized additive model with penalized cubic regression splines. In panel **A**,  $r = 0$ . In panel **B**,  $r = 0.25$ . In panel **C**,  $r = 0.5$ .

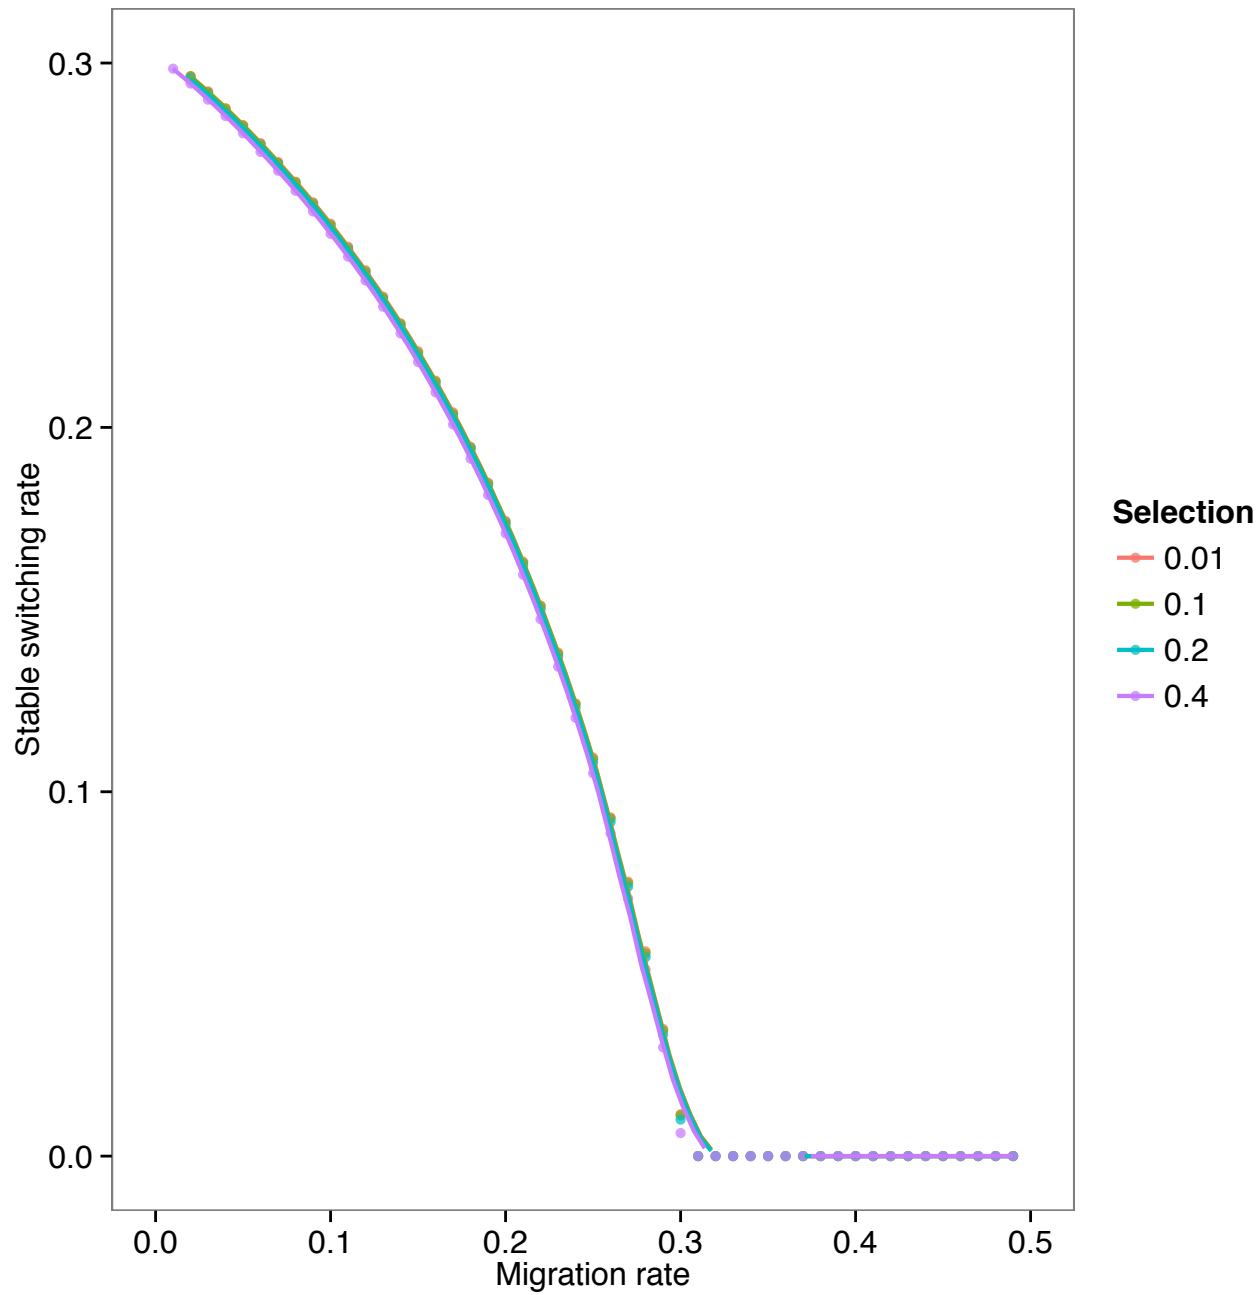

**Figure S3. The evolutionarily stable switching rate as function of migration and symmetric selection coefficient  $s$ .** Recombination rate is  $r = 0$ . The environment changes every  $n = 4$  generations. The symmetric selection coefficient  $s$  shown in the legend. The plotted curves represent a fit to the data using a generalized additive model with penalized cubic regression splines. The stable switching rate is invariant to the strength of symmetric selection between the two demes.
