# Supplementary material
Source: PubMed Central journal article supplement (PMC3982689)
Supplement: 43aec75c8f5a4b8f620da0958d849541_genetics.114.161364-1.pdf [file 43aec75c8f5a4b8f620da0958d849541_genetics.114.161364-1.pdf]

**File S3**

**Proof of Result 3**

The asymmetric equilibrium  $(\hat{x}, \hat{y})$  is determined by the solutions of the quadratic equation

$$T(x; \mu_B) = (1 - m)s^2x^2 - sx[s(1 - m) - \mu_B(s + 2)(1 - 2m)] - \mu_B(2m + s) = 0. \quad (\text{S3.1})$$

When  $\mu_B = 0$ , equation (S3.1) reduces to

$$T(x; 0) = -(1 - m)s^2x(1 - x) = 0, \quad (\text{S3.2})$$

giving the two solutions  $\hat{x} = 0$  and  $\hat{x} = 1$ . As  $T(0; \mu_B) < 0$ , when  $\mu_B > 0$  the solution  $x = 0$  shifts to a negative solution of (S3.1). Hence, when  $\mu_B$  is positive and small, the positive root  $\hat{x}(\mu_B)$  of  $T(x; \mu_B) = 0$  is close to  $x = 1$ . That is, when  $\mu_B$  is small the corresponding asymmetric equilibrium is close to the fixation of  $AB$  where  $\hat{x} = \hat{y} = 1$ . Moreover, by continuity, if  $\mu_B$  is small, their stability is the same. Near fixation of  $AB$ ,  $w = 1 - x$  and  $z = 1 - y$  are small, and up to non-linear terms, when  $\mu_B = 0$ , we have

$$\begin{aligned} w' &= \frac{1 - m}{1 + s}w + m(s + 1)z \\ z' &= \frac{m}{1 + s}w + (1 - m)(s + 1)z. \end{aligned} \quad (\text{S3.3})$$

The characteristic polynomial  $P(\lambda)$  of (S3.3) is

$$P(\lambda) = \lambda^2 - (1 - m) \left[ (1 + s) + \frac{1}{1 + s} \right] \lambda + (1 - 2m) \quad (\text{S3.4})$$

and

$$P(1) = 1 - (1 - m) \frac{(1 + s)^2 + 1}{1 + s} + 1 - 2m. \quad (\text{S3.5})$$

In fact, it can be easily seen that

$$(1 + s)P(1) = -s^2(1 - m). \quad (\text{S3.6})$$

As  $P(+\infty) > 0$  and  $P(1) < 0$ , since  $s > 0$ ,  $0 < m < 1$ ,  $P(\lambda)$  has a root larger than 1. Thus, when  $\mu_B$  is small, fixation in  $AB$  is internally locally unstable and so is the asymmetric equilibrium when  $\mu_B$  is small.
