# Supplementary material
Source: PubMed Central journal article supplement (PMC3982689)
Supplement: 82be1b4cf18784b5621aabc8a08ca965_genetics.114.161364-12.pdf [file 82be1b4cf18784b5621aabc8a08ca965_genetics.114.161364-12.pdf]

**File S5**

**Proof of Result 5**

At a symmetric equilibrium  $y = x$ , and also, by (32),  $\tilde{y} = \tilde{x}$ . Thus (30) and (31) imply that

$$\tilde{x} = \frac{[(s+1)(1-m_B) - m_B]x + m_B}{sx + 1} \quad (S5.1)$$

and

$$x = \frac{[(1-m_B) - m_B(s+1)]\tilde{x} + m_B(1+s)}{(1+s) - s\tilde{x}}. \quad (S5.2)$$

Substituting (S5.1) into (S5.2) gives the quadratic equation

$$(s+2)m_B \{sx^2 + [2 - m_B(s+2)]x - (1 - m_B)\} = 0. \quad (S5.3)$$

As  $0 < m, \mu_B < 1$ ,  $s > 0$  and  $m_B = m(1 - \mu_B) + \mu_B(1 - m) > 0$ ,  $x$  satisfies the equation  $R(x) = 0$  with  $R(x)$  given in (36). As  $0 < m_B < 1$  we have  $R(0) < 0$ , and as  $R(\pm\infty) > 0$ ,  $R(x) = 0$  has two real roots, one positive and one negative. Observe that

$$R(1) = s + [2 - m_B(s+2)] - (1 - m_B) = (1 - m_B)(s+1) > 0 \quad (S5.4)$$

and

$$R\left(\frac{1}{2}\right) = \frac{s}{4} + \frac{1}{2} \cdot [2 - m_B(s+2)] - (1 - m_B) = \frac{s}{4}(1 - 2m)(1 - 2\mu_B) \quad (S5.5)$$

as  $1 - 2m_B = 1 - 2m - 2\mu_B + 4m\mu_B = (1 - 2m)(1 - 2\mu_B)$ . Therefore when  $0 < m, \mu_B < \frac{1}{2}$  we have  $R(\frac{1}{2}) > 0$  and  $0 < \bar{x} < \frac{1}{2}$ .
