# Supplementary material
Source: PubMed Central journal article supplement (PMC3982689)
Supplement: 6142a8251d18f8d106dae0bea8b13f44_genetics.114.161364-7.pdf [file 6142a8251d18f8d106dae0bea8b13f44_genetics.114.161364-7.pdf]

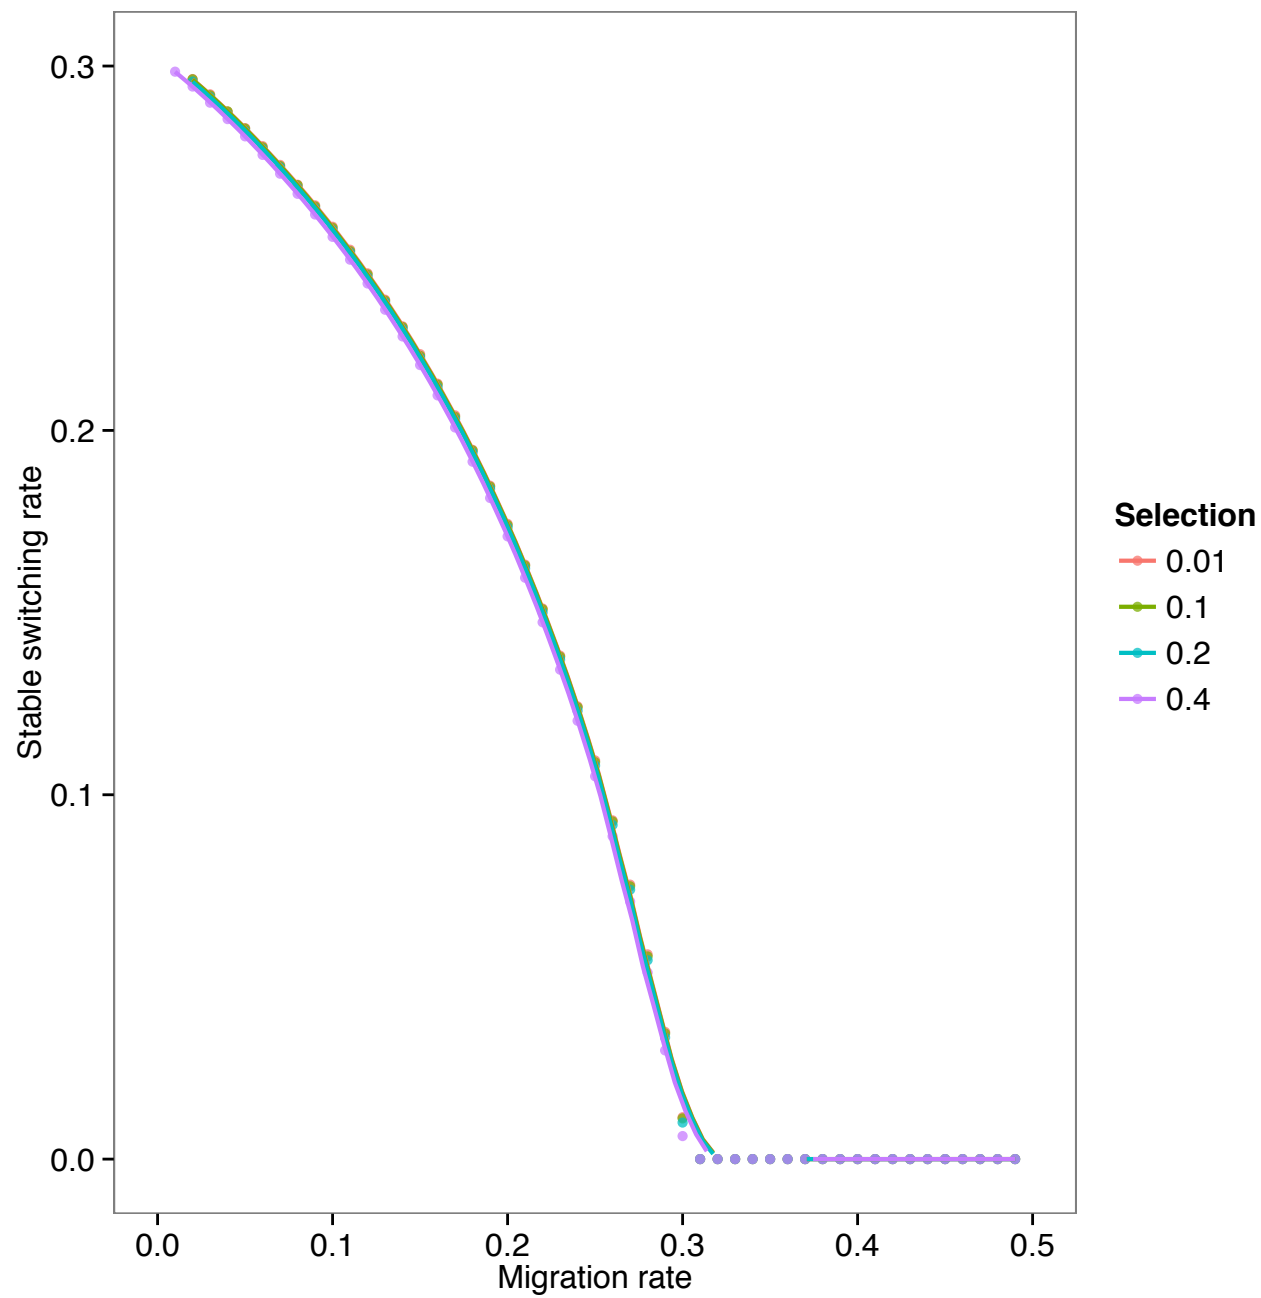

**Figure S3. The evolutionarily stable switching rate as function of migration and symmetric selection coefficient  $s$ .** Recombination rate is  $r = 0$ . The environment changes every  $n = 4$  generations. The symmetric selection coefficient  $s$  shown in the legend. The plotted curves represent a fit to the data using a generalized additive model with penalized cubic regression splines. The stable switching rate is invariant to the strength of symmetric selection between the two demes.
