# Supplementary material
Source: PubMed Central journal article supplement (PMC3982689)
Supplement: 9302363b64f086bab5064ab8ade937ba_genetics.114.161364-8.pdf [file 9302363b64f086bab5064ab8ade937ba_genetics.114.161364-8.pdf]

**File S2**

**Proof of Result 2**

If an asymmetric polymorphism exists, then (11) holds, namely, (with  $\mu = \mu_B$ ),

$$1 + sy = \frac{(1 - 2\mu)(1 + s)}{1 + sx}. \quad (\text{S2.1})$$

That is,

$$y = \frac{s(1 - x) - 2\mu(1 + s)}{s(1 + sx)}, \quad 1 - y = \frac{s(1 + s)x + 2\mu(1 + s)}{s(1 + sx)}. \quad (\text{S2.2})$$

Substituting these relations into the equilibrium equation for  $x$  from (8), we find, after some simplification, that

$$x = \frac{1 - m}{1 + sx} [(1 - \mu)(1 + s)x + \mu(1 - x)] + \frac{m}{s}(sx + 2\mu + \mu s). \quad (\text{S2.3})$$

Equation (S2.3) is equivalent to the quadratic equation

$$T(x) = (1 - m)s^2x^2 - sx[s(1 - m) - \mu(s + 2)(1 - 2m)] - \mu(2m + s) = 0. \quad (\text{S2.4})$$

As  $\mu, m, s$  are positive and  $m < 1$ , we have  $T(0) < 0$  and  $T(\pm\infty) > 0$ , implying that  $T(x)$  has two real roots, one positive and one negative. Now

$$\begin{aligned} T(1) &= (1 - m)s^2 - s[s(1 - m) - \mu(s + 2)(1 - 2\mu)] - \mu(2m + s) \\ &= \mu[s(s + 2)(1 - 2m) - (2m + s)]. \end{aligned} \quad (\text{S2.5})$$

$T(1; m)$  is a linear function of  $m$  and

$$\begin{aligned} T(1; 0) &= \mu s(s + 1) > 0 \\ T(1; \frac{1}{2}) &= -\mu(2m + s) < 0 \\ T(1; m_0) &= 0. \end{aligned} \quad (\text{S2.6})$$

Hence if  $0 < m < m_0$ ,  $T(1; m) > 0$  and a unique  $0 < \hat{x} < 1$  exists such that  $T(\hat{x}) = 0$ . In order for  $\hat{x}$  to be an equilibrium, its corresponding  $\hat{y}$  should satisfy  $0 < \hat{y} < 1$ , where

$$1 - \hat{y} = \frac{1 + s}{1 + s\hat{x}} \frac{s\hat{x} + 2\mu}{s} \quad (\text{S2.7})$$

and  $0 < \hat{y} < 1$  if and only if

$$(1 + s)(s\hat{x} + 2\mu) < s(1 + s\hat{x}) \quad (\text{S2.8})$$

or

$$\hat{x} < \frac{s - 2\mu(1 + s)}{s}. \quad (S2.9)$$

So  $0 < \hat{x} < 1$  if  $0 < \mu < \mu_0 = \frac{1}{2} \frac{s}{s+1}$ , and  $[s - 2\mu(1 + s)] > 0$ . We compute  $T\left(\frac{s-2\mu(1+s)}{s}\right)$ , which equals

$$(1 - m)[s - 2\mu(1 + s)]^2 - [s - 2\mu(1 + s)][s(1 - m) - \mu(s + 2)(1 - 2m)] - \mu(2m + s). \quad (S2.10)$$

So

$$T\left(\frac{s-2\mu(1+s)}{s}\right) = 2\mu^2(1 + s)(s + 2m) + s\mu(s + 2)(1 - 2m) - \mu(2m + s). \quad (S2.11)$$

But when  $0 < m < m_0$ ,

$$T(1) = s\mu(s + 2)(1 - 2m) - \mu(2m + s) > 0, \quad (S2.12)$$

therefore  $T\left(\frac{s-2\mu(1+s)}{s}\right) > 0$ , and (S2.9) holds.
