# Supplementary material
Source: PubMed Central journal article supplement (PMC3982689)
Supplement: 4067606180a3bb8d2801148a259d02c4_genetics.114.161364-3.pdf [file 4067606180a3bb8d2801148a259d02c4_genetics.114.161364-3.pdf]

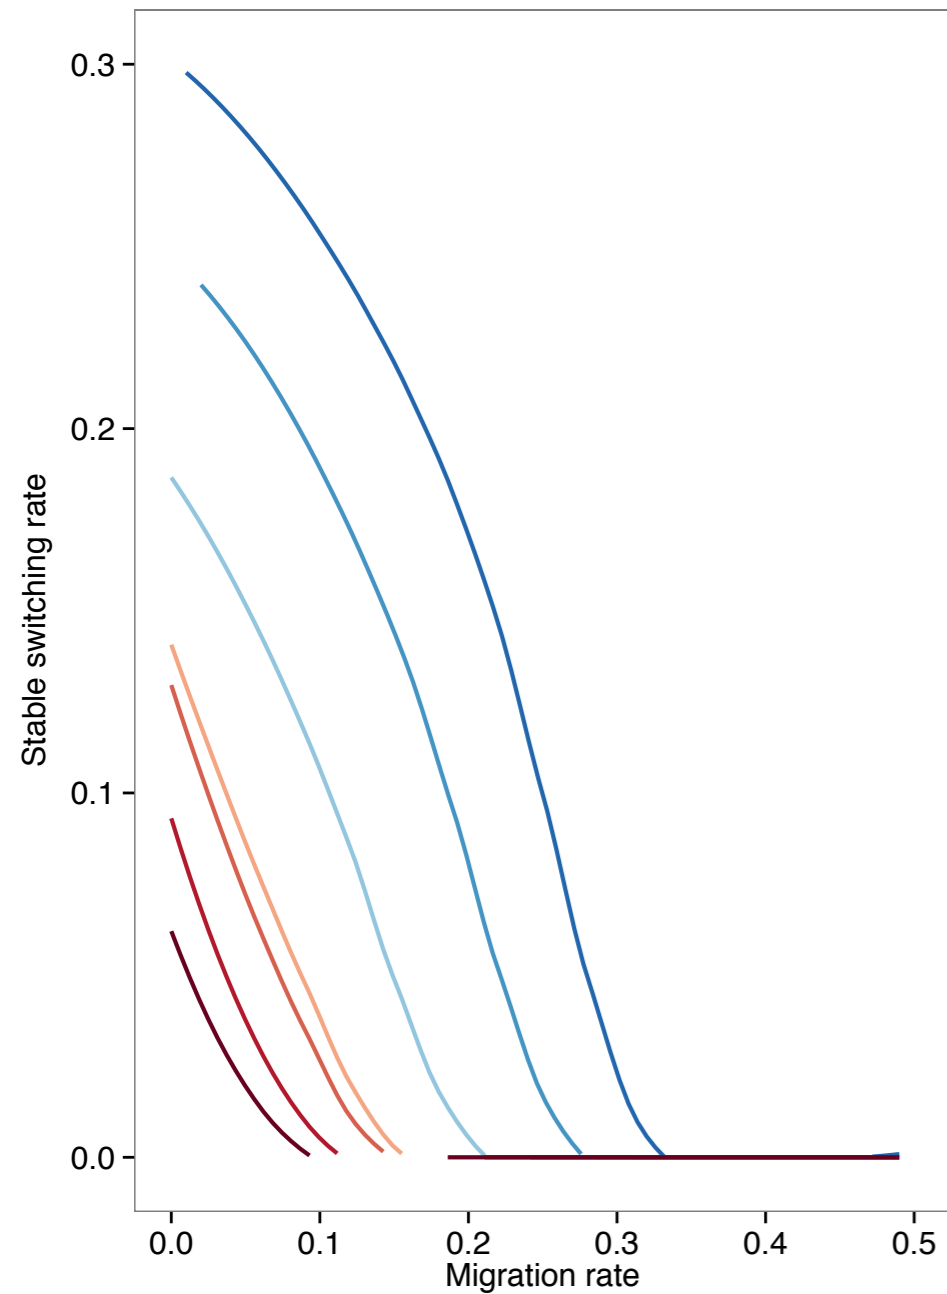

(A)

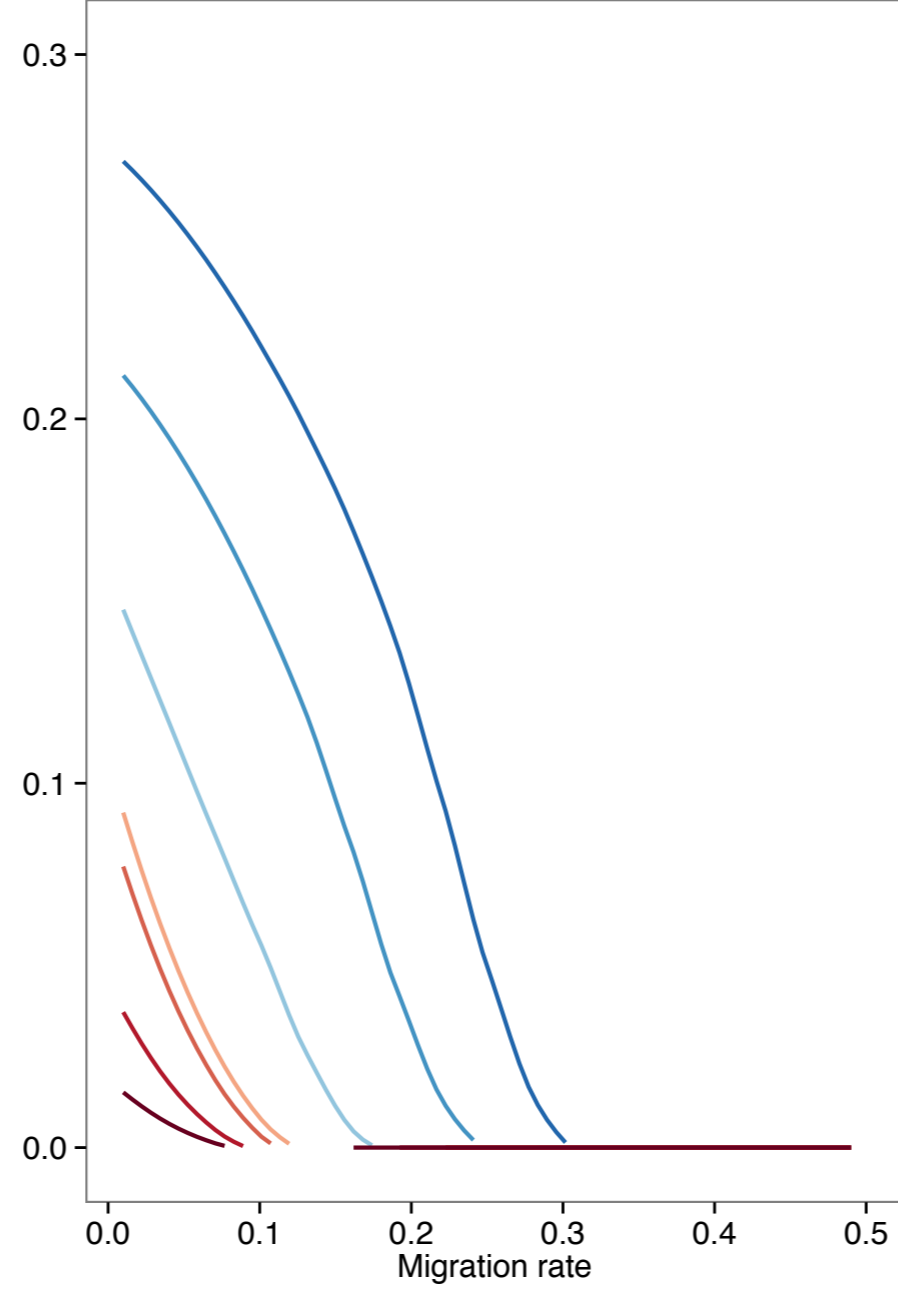

(B)

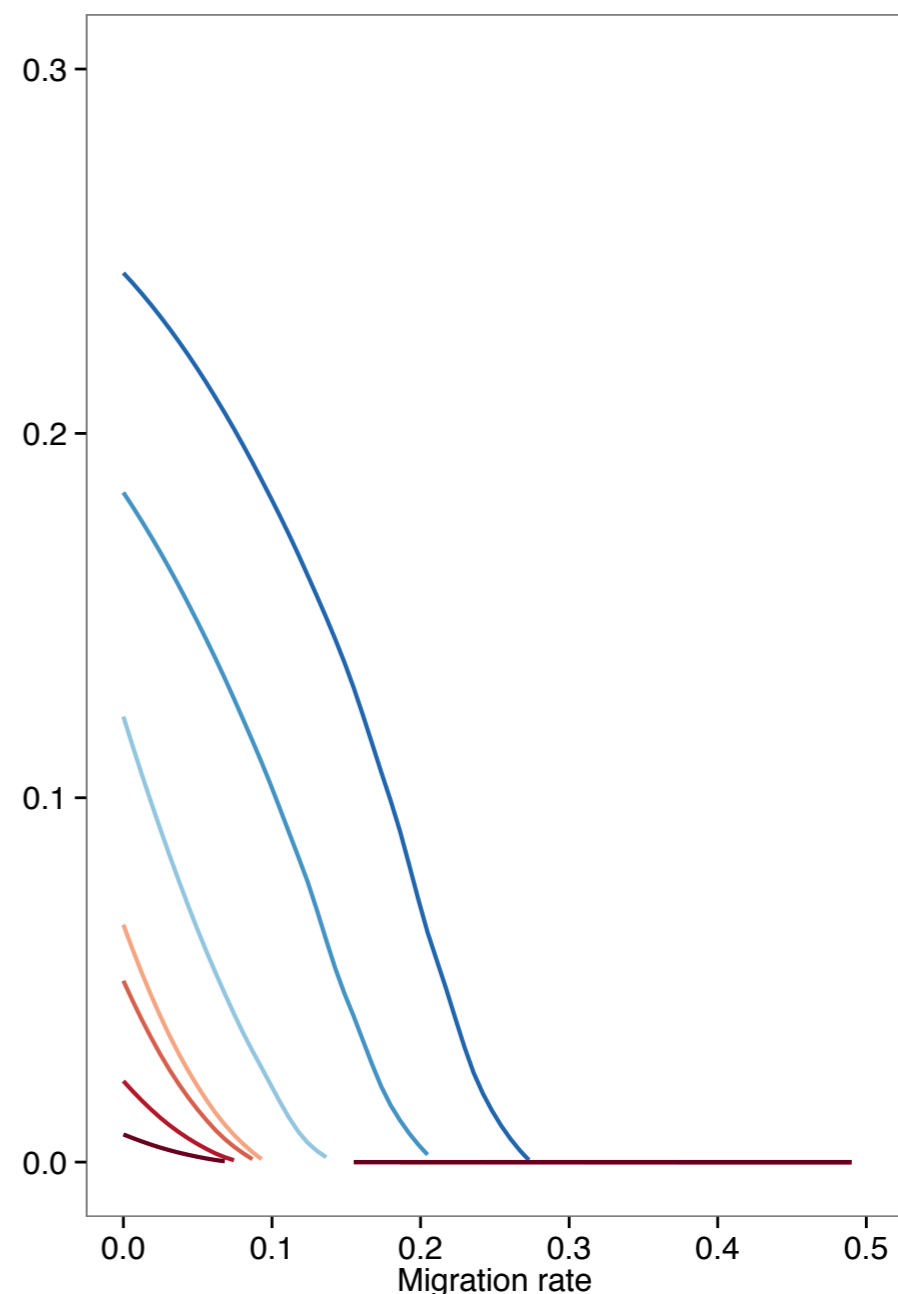

(C)

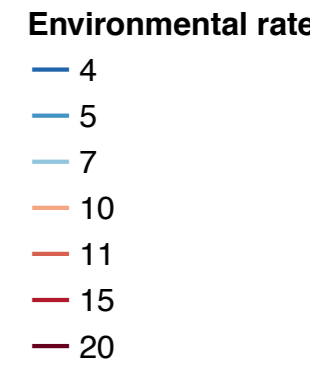

**Figure S2. The evolutionarily stable switching rate as function of migration and environmental rate of change,  $n > 3$  for different recombination rates.** The symmetric selection coefficient  $s = 0.4$ . The rate of environmental change  $n$  shown in the legend. The plotted curves represent a fit to the data using a generalized additive model with penalized cubic regression splines. In panel **A**,  $r = 0$ . In panel **B**,  $r = 0.25$ . In panel **C**,  $r = 0.5$ .
