# Supplementary material
Source: PubMed Central journal article supplement (PMC3982689)
Supplement: bb7549102f4bf6d2bbb17d793a09dbbe_genetics.114.161364-2.pdf [file bb7549102f4bf6d2bbb17d793a09dbbe_genetics.114.161364-2.pdf]

**File S8**

**Proof of Result 8**

*i.* In a constant environment, the mean fitness  $w^*$  at the symmetric equilibrium  $(\bar{x}^*, \bar{y}^*)$  is  $w^* = 1 + sx^*$ , and it is a decreasing function of  $\mu_B$  if  $\frac{\partial x^*}{\partial \mu_B}$  is negative, or equivalently if  $\frac{\partial x^*}{\partial m_B}$  is negative (since  $m_B = m + \mu_B(1 - 2m)$  and  $0 \leq m < \frac{1}{2}$ ). Using the equilibrium equation (14),

$$\frac{\partial x^*}{\partial m_B} = \frac{1 - (s + 2)x^*}{2sx^* + [(s + 2)m_B - s]}. \quad (\text{S8.1})$$

As  $x^* > \frac{1}{s+2}$ , in order for  $\frac{\partial x^*}{\partial m_B}$  to be negative, it is sufficient that

$$x^* > \frac{s - m_B(s + 2)}{2s}. \quad (\text{S8.2})$$

This follows easily from the fact that  $Q(x)$  of (14) satisfies  $Q(0) < 0$ ,  $Q(x^*) = 0$ , and  $Q\left(\frac{s - m_B(s + 2)}{2s}\right) < 0$ .

*ii.* With a fitness cycle of period 2, the mean fitness  $\bar{w}$  at the symmetric equilibrium  $(\bar{x}, \bar{y})$  is

$$\bar{w} = (1 + s) + sm_B[(s + 2)\bar{x} - 1]. \quad (\text{S8.3})$$

$\bar{w}$  is an increasing function of  $\mu_B$  if  $\frac{\partial \bar{w}}{\partial \mu_B} > 0$  or equivalently if  $\frac{\partial \bar{w}}{\partial m_B} > 0$ . Now

$$\frac{\partial \bar{w}}{\partial m_B} = s[(s + 2)\bar{x} - 1] + s(s + 2)m_B \frac{\partial \bar{x}}{\partial m_B}. \quad (\text{S8.4})$$

Thus  $\frac{\partial \bar{w}}{\partial m_B} > 0$  provided  $\frac{\partial \bar{x}}{\partial m_B} > 0$ . Using the equilibrium equation  $R(x) = 0$  for  $\bar{x}$ , we have

$$\frac{\partial \bar{x}}{\partial m_B} = \frac{\bar{x}(s + 1) - 1}{2s\bar{x} + [2 - m_B(s + 2)]}. \quad (\text{S8.5})$$

Since  $[\bar{x}(s + 1) - 1] > 0$ , we conclude that  $\frac{\partial \bar{x}}{\partial m_B} > 0$  if

$$\bar{x} > \frac{m_B(s + 2) - 2}{2s}, \quad (\text{S8.6})$$

which follows from  $R(0) < 0$ ,  $R(\bar{x}) = 0$ , and  $R\left(\frac{m_B(s + 2) - 2}{2s}\right) < 0$ .
