# Supplementary material
Source: PubMed Central journal article supplement (PMC3982689)
Supplement: dfc8117e453be0eb1d1e39390c7a67b0_genetics.114.161364-4.pdf [file dfc8117e453be0eb1d1e39390c7a67b0_genetics.114.161364-4.pdf]

## File S1

### Proof of Result 1

1. When  $y = x$ , the mean fitnesses in the two demes  $E_x$  and  $E_y$  are equal:

$$w_x = 1 + sx = 1 + sy = w_y, \quad (S1.1)$$

and, from (8), the equilibrium equation is, (with  $\mu = \mu_B$ ),

$$(1 + sx)x = (1 - m)[(1 - \mu)(1 + s)x + \mu(1 - x)] + m[(1 - \mu)(1 - x) + \mu(1 + s)x]. \quad (S1.2)$$

Thus

$$(1 + sx)x = (1 + s)x[(1 - m)(1 - \mu) + m\mu] + (1 - x)[\mu(1 - m) + m(1 - \mu)], \quad (S1.3)$$

or

$$x + sx^2 = (1 + s)x[1 - m - \mu + 2m\mu] + (1 - x)[m + \mu - 2m\mu]. \quad (S1.4)$$

This is equivalent to

$$Q(x) = sx^2 + [(s + 2)(m + \mu - 2m\mu) - s]x - (m + \mu - 2m\mu) = 0. \quad (S1.5)$$

Now, as  $0 < m, \mu < 1$ , we have

$$(m + \mu - 2m\mu) = m(1 - \mu) + \mu(1 - m) > 0. \quad (S1.6)$$

Therefore

$$Q(0) = -(m + \mu - 2m\mu) < 0 \quad (S1.7)$$

and

$$Q(1) = (s + 1)(m + \mu - 2m\mu) > 0. \quad (S1.8)$$

As  $Q(\pm\infty) > 0$ , we conclude that the equation (S1.5) has a unique root  $x^*$  with  $0 < x^* < 1$ . Thus there is a unique symmetric polymorphism  $(\mathbf{x}^*, \mathbf{y}^*)$ , given by (13).

2. Near the equilibrium  $(\mathbf{x}^*, \mathbf{y}^*)$ , on the boundary where only  $B$  is present,  $(z - x)$  is small, and from (10), the internal local stability of  $(\mathbf{x}^*, \mathbf{y}^*)$  in the boundary is determined by the factor

$$C^* = \frac{(1 - 2\mu)(1 + s)}{(1 + sx^*)(1 + sz^*)}. \quad (S1.9)$$

As  $x^* = z^*$ ,  $C^* < 1$  if  $(1+s) < (1+sx^*)^2$ , and as  $s > 0$  this is true if  $s(x^*)^2 + 2x^* > 1$ .

From the equilibrium equation (S1.5), as  $Q(x^*) = 0$  we have

$$\begin{aligned} s(x^*)^2 + 2x^* &= -[(s+2)(m+\mu-2m\mu) - s]x^* + (m+\mu-2m\mu) + 2x^* \\ &= -(s+2)(m+\mu-2m\mu-1)x^* + (m+\mu-2m\mu). \end{aligned} \quad (S1.10)$$

Thus  $s(x^*)^2 + 2x^* > 1$  if and only if

$$(s+2)(1-m-\mu+2m\mu)x^* > (1-m-\mu+2m\mu). \quad (S1.11)$$

But  $(1-m-\mu+2m\mu) = (1-m)(1-\mu) + m\mu > 0$  as  $0 < m, \mu < 1$ , and so  $C^* < 1$  provided  $x^* > \frac{1}{s+2}$ . As  $Q(1) > 0$  and  $Q(x^*) = 0$ , it is sufficient to show that  $Q(\frac{1}{s+2}) < 0$ . Indeed

$$\begin{aligned} Q\left(\frac{1}{s+2}\right) &= \frac{s}{(s+2)^2} + [(s+2)(m+\mu-2m\mu) - s]\frac{1}{s+2} - (m+\mu-2m\mu) \\ &= \frac{s}{(s+2)^2} - \frac{s}{s+2} = -\frac{s(s+1)}{(s+2)^2} < 0. \end{aligned} \quad (S1.12)$$

3. We compute  $Q(\frac{1}{2})$  using (14),

$$Q\left(\frac{1}{2}\right) = \frac{s}{4} + \frac{1}{2}[(s+2)(m+\mu-2m\mu) - s] - (m+\mu-2m\mu). \quad (S1.13)$$

In fact,

$$Q\left(\frac{1}{2}\right) = -\frac{s}{4}[1 - 2(m+\mu-2m\mu)]. \quad (S1.14)$$

But  $1 - 2(m+\mu-2m\mu) = (1-2m)(1-2\mu) > 0$  when  $0 < m, \mu < \frac{1}{2}$ , in which case  $Q(\frac{1}{2}) < 0$  and  $x^* > \frac{1}{2}$  as  $Q(1) > 0$ .
