# Supplementary material
Source: PubMed Central journal article supplement (PMC3982689)
Supplement: fa148da40c92457832248bfa7473b093_genetics.114.161364-9.pdf [file fa148da40c92457832248bfa7473b093_genetics.114.161364-9.pdf]

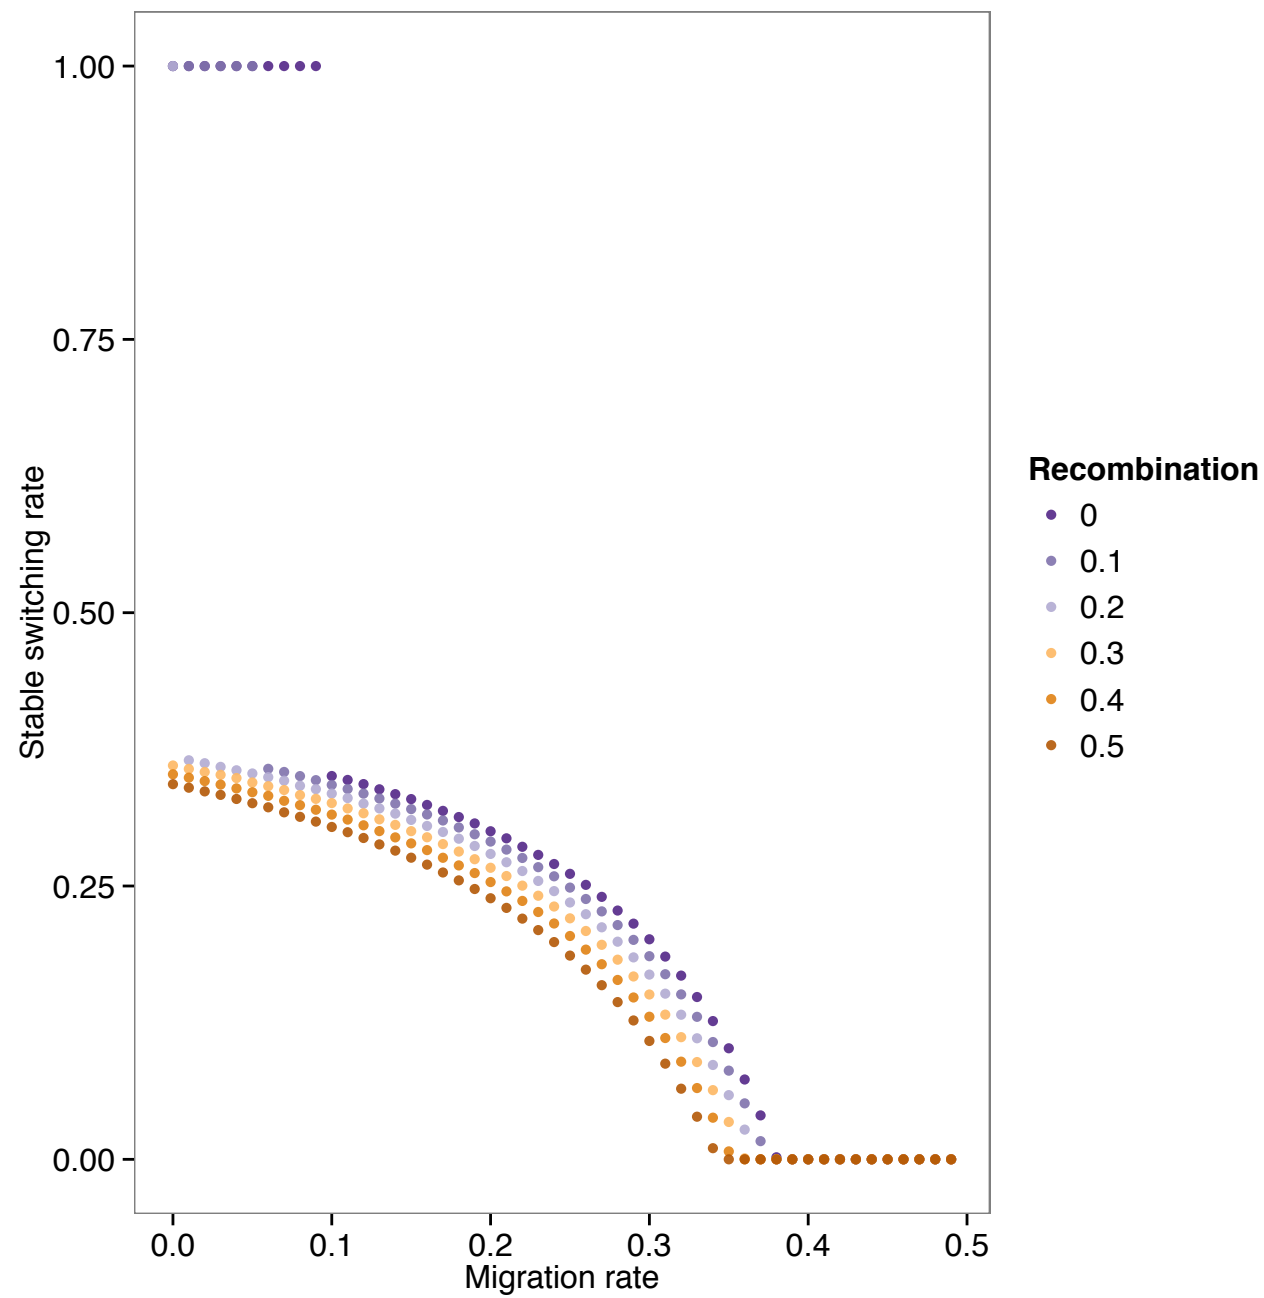

**Figure S1. The evolutionarily stable switching rate as function of migration and recombination rate,  $n = 3$ .** The symmetric selection coefficient  $s = 0.4$ . Recombination rates shown in the legend. The stable switching rate for  $n = 3$  is sensitive to the interplay of recombination and migration rates, with sudden possible discontinuities in the stable switching rate.
