# Supplementary material
Source: PubMed Central journal article supplement (PMC3982689)
Supplement: fb99b7de663287c607631c5bd8089956_genetics.114.161364-6.pdf [file fb99b7de663287c607631c5bd8089956_genetics.114.161364-6.pdf]

**File S4**

**Proof of Result 4**

A straightforward computation shows that the  $4 \times 4$  matrix  $\mathbf{L}_{\text{ex}}$  can be written as

$$\mathbf{L}_{\text{ex}} = \begin{pmatrix} (1-m)A & (1-m)B & mC & mD \\ (1-m)D & (1-m)C & mB & mA \\ mA & mB & (1-m)C & (1-m)D \\ mD & mC & (1-m)B & (1-m)A \end{pmatrix}, \quad (\text{S4.1})$$

where

$$\begin{aligned} (1+sx^*)A &= (1+s)(1-\mu_b) + r(1-x^*)[(s+2)\mu_b - (s+1)] \\ (1+sx^*)B &= (1+s)rx^* + \mu_b[1 - (s+2)rx^*] \\ (1+sx^*)C &= (1-\mu_b) + rx^*[(s+2)\mu_b - 1] \\ (1+sx^*)D &= (1+s)\mu_b + r(1-x^*)[1 - (s+2)\mu_b]. \end{aligned} \quad (\text{S4.2})$$

Observe that “formally”  $A, B, C, D$  are linear in  $\mu_b$ . Let  $A_0$  be the value of  $A$  when  $\mu_b = 0$  and  $A_1$  be its value when  $\mu_b = 1$ . Similarly we have  $B_0, B_1, C_0, C_1, D_0, D_1$ . In fact,

$$\begin{aligned} (1+sx^*)A_0 &= (1+s)[1 - r(1-x^*)] \\ (1+sx^*)A_1 &= r(1-x^*) \\ (1+sx^*)B_0 &= (1+s)rx^* \\ (1+sx^*)B_1 &= 1 - rx^* \\ (1+sx^*)C_0 &= 1 - rx^* \\ (1+sx^*)C_1 &= (1+s)rx^* \\ (1+sx^*)D_0 &= r(1-x^*) \\ (1+sx^*)D_1 &= (1+s)[1 - r(1-x^*)]. \end{aligned} \quad (\text{S4.3})$$

As  $0 < r < 1$ ,  $0 < x^* < 1$  we have  $A_i, B_i, C_i, D_i$  positive for  $i = 0, 1$ . Hence, as  $A, B, C, D$  are linear in  $\mu_b$ ,  $A, B, C, D$  are all positive for  $0 < \mu_b < 1$ . Moreover we have

$$C_0 = B_1, \quad C_1 = B_0, \quad D_0 = A_1, \quad D_1 = A_0. \quad (\text{S4.4})$$

Let  $S(\lambda) = \det(\mathbf{L}_{\text{ex}} - \lambda\mathbf{I})$  be the characteristic polynomial of  $\mathbf{L}_{\text{ex}}$ . The structure of  $\mathbf{L}_{\text{ex}}$  given in (S4.1) entails that  $S(\lambda)$  factors into the product of two quadratic polynomials  $S_1(\lambda)$  and  $S_2(\lambda)$ :

$$S(\lambda) = S_1(\lambda)S_2(\lambda), \quad (\text{S4.5})$$

where

$$\begin{aligned} S_1(\lambda) &= \lambda^2 - \lambda[(1-m)(A+C) + m(B+D)] + (1-2m)(AC - BD) \\ S_2(\lambda) &= \lambda^2 - \lambda[(1-m)(A+C) - m(B+D)] + (1-2m)(AC - BD). \end{aligned} \quad (S4.6)$$

See Balkau and Feldman (1973) for analogous calculations with migration modification. Consider first the roots of  $S_1(\lambda) = 0$ . These are real since the discriminant of  $S_1(\lambda) = 0$  is

$$\begin{aligned} & [(1-m)(A+C) + m(B+D)]^2 - 4(1-2m)(AC - BD) = \\ & = [(1-m)(A-C) + m(B-D)]^2 + 4m(1-m)(AD + BC) + 4(1-m)^2 BD + 4m^2 AC, \end{aligned} \quad (S4.7)$$

which is positive since  $A, B, C, D$  are positive and  $0 < m < 1$ .

In addition,

$$\begin{aligned} AC - BD &= [(1-\mu_b)A_0 + \mu_b A_1] [(1-\mu_b)(C_0 + \mu_b C_1)] \\ &\quad - [(1-\mu_b)B_0 + \mu_b B_1] [(1-\mu_b)D_0 + \mu_b D_1]. \end{aligned} \quad (S4.8)$$

Since  $C_0 = B_1, C_1 = B_0, D_0 = A_1, D_1 = A_0$ , (S4.8) reduces to

$$AC - BD = (1 - 2\mu_b)(A_0 B_1 - A_1 B_0). \quad (S4.9)$$

Substituting  $A_0, A_1, B_0, B_1$  from (S4.3) we have

$$(1 + sx^*)^2 (AC - BD) = (1 - 2\mu_b)(1 + s)(1 - r). \quad (S4.10)$$

Since we assume  $0 < m, \mu_b < \frac{1}{2}$ , the two roots of  $S_1(\lambda) = 0$  are positive. Both of these roots are less than 1 if and only if  $S_1(1) > 0$  and  $S'_1(1) > 0$ .

$$S'_1(1) = 2 - [(1-m)(A+C) + m(B+D)]. \quad (S4.11)$$

As  $C_0 = B_1, C_1 = B_0, D_0 = A_1, D_1 = A_0$ , we have

$$\begin{aligned} (A+C) &= (1-\mu_b)(A_0 + C_0) + \mu_b(A_1 + C_1) \\ &= (1-\mu_b)(A_0 + C_0) + \mu_b(B_0 + D_0), \end{aligned} \quad (S4.12)$$

$$\begin{aligned} (B+D) &= (1-\mu_b)(B_0 + D_0) + \mu_b(B_1 + D_1) \\ &= (1-\mu_b)(B_0 + D_0) + \mu_b(A_0 + C_0). \end{aligned} \quad (S4.13)$$

Hence,

$$(1 - m)(A + C) + m(B + D) = (1 - m_b)(A_0 + C_0) + m_b(B_0 + D_0), \quad (S4.14)$$

where

$$m_b = m + \mu_b - 2m\mu_b. \quad (S4.15)$$

Substituting for  $A_0, B_0, C_0, D_0$ , gives

$$S'_1(1) = (1 + sx^*)^{-1} [r + rsx^* + s(1 - r)(2x^* - 1) + m_b(1 - r)(s + 2)]. \quad (S4.16)$$

Now  $s > 0$ ,  $0 < r < 1$ ,  $m_b = m(1 - \mu_b) + \mu_b(1 - m) > 0$ , and  $x^* > \frac{1}{2}$  if  $0 < m, \mu_B < \frac{1}{2}$ . Therefore  $S'(1) > 0$  provided  $0 < m, \mu_B < \frac{1}{2}$ . Using (S4.11) and (S4.16) it is easily seen that  $S(1) > 0$  if

$$(1 + sx^*)^{-2}(1 - r) \left\{ (x^*)^2 s^2 + sx^* [-s + m_b(s + 2)] - sm_b \right\} > 0. \quad (S4.17)$$

Using the equation  $Q(x^*) = 0$  from (14), we have

$$s(x^*)^2 + [(s + 2)m_B - s]x^* - m_B = 0, \quad (S4.18)$$

where

$$m_B = m + \mu_B - 2m\mu_B. \quad (S4.19)$$

Therefore (S4.17) is satisfied if and only if

$$(m_b - m_B)(1 + sx^*)^{-2}(1 - r)s[x^*(2 + s) - 1] > 0. \quad (S4.20)$$

As  $x^* > \frac{1}{2}$ , by Result 1, and  $0 < m < \frac{1}{2}$ , (S4.20) holds if and only if  $m_b > m_B$ , which is true if and only if  $\mu_b > \mu_B$ .

It is not obvious that the roots of  $S_2(\lambda) = 0$  are real. However, as the matrix  $\mathbf{L}_{\text{ex}}^*$  is positive, the Perron-Frobenius theory ensures that its largest eigenvalue in magnitude is positive. Therefore we just have to ensure that when both eigenvalues are real and positive they are less than 1; when they are real, both are positive or both are negative

since  $(1 - 2m)(1 - 2\mu_b)(AC - BD)$  is positive for  $0 < m, \mu_b < \frac{1}{2}$ . The conditions for this are that both  $S_2(1)$  and  $S'_2(1)$  are positive. But

$$\begin{aligned} S_2(1) &= 1 - [(1 - m)(A + C) - m(B + D)] + (1 - 2m)(AC - BD) \\ &> 1 - [(1 - m)(A + C) + m(B + D)] + (1 - 2m)(AC - BD) = S_1(1), \end{aligned} \tag{S4.21}$$

and  $S_1(1) > 0$  when  $0 < m, \mu_b < \frac{1}{2}$  and  $\mu_b > \mu_B$ , so also  $S_2(1) > 0$ . Similarly

$$\begin{aligned} S'_2(1) &= 2 - [(1 - m)(A + C) - m(B + D)] \\ &> 2 - [(1 - m)(A + C) + m(B + D)] = S'_1(1). \end{aligned} \tag{S4.22}$$

Thus, when  $S'_1(1) > 0$  also  $S'_2(1) > 0$ .
