# Supplementary material
Source: PubMed Central journal article supplement (PMC3982689)
Supplement: fe60fac6ed749bcd1f42dd9013041f7b_genetics.114.161364-10.pdf [file fe60fac6ed749bcd1f42dd9013041f7b_genetics.114.161364-10.pdf]

**File S7**

**Proof of Result 7**

As the transformation  $T$  of the population state is  $T = T_2 \circ T_1$ , where  $T_i$  corresponds to phase  $i$ , with selection of type  $i$ , for  $i = 1, 2$ , and as  $\tilde{\mathbf{x}} = T_1 \bar{\mathbf{x}}$ ,  $\bar{\mathbf{x}} = T_2 \tilde{\mathbf{x}}$ , following the analysis for the case without cycles, the linear approximation matrix  $\mathbf{L}_{\text{ex}}$  becomes

$$\mathbf{L}_{\text{ex}} = \mathbf{L}_{\text{ex}}^2 \cdot \mathbf{L}_{\text{ex}}^1, \quad (\text{S7.1})$$

where, as in (S4.1) and (S4.2), we have

$$\mathbf{L}_{\text{ex}}^1 = \begin{pmatrix} (1-m)\bar{A} & (1-m)\bar{B} & m\bar{C} & m\bar{D} \\ (1-m)\bar{D} & (1-m)\bar{C} & m\bar{B} & m\bar{A} \\ m\bar{A} & m\bar{B} & (1-m)\bar{C} & (1-m)\bar{D} \\ m\bar{D} & m\bar{C} & (1-m)\bar{B} & (1-m)\bar{A} \end{pmatrix}, \quad (\text{S7.2})$$

$$\mathbf{L}_{\text{ex}}^2 = \begin{pmatrix} (1-m)\tilde{A} & (1-m)\tilde{B} & m\tilde{C} & m\tilde{D} \\ (1-m)\tilde{D} & (1-m)\tilde{C} & m\tilde{B} & m\tilde{A} \\ m\tilde{A} & m\tilde{B} & (1-m)\tilde{C} & (1-m)\tilde{D} \\ m\tilde{D} & m\tilde{C} & (1-m)\tilde{B} & (1-m)\tilde{A} \end{pmatrix}, \quad (\text{S7.3})$$

and

$$\begin{aligned} (1+s\bar{x})\bar{A} &= (1+s)(1-\mu_b) + r(1-\bar{x})[(s+2)\mu_b - (s+1)] \\ (1+s\bar{x})\bar{B} &= (1+s)r\bar{x} + \mu_b[1 - (s+2)r\bar{x}] \\ (1+s\bar{x})\bar{C} &= (1-\mu_b) + r\bar{x}[(s+2)\mu_b - 1] \\ (1+s\bar{x})\bar{D} &= (1+s)\mu_b + r(1-\bar{x})[1 - (s+2)\mu_b], \end{aligned} \quad (\text{S7.4})$$

$$\begin{aligned} [1+s(1-\tilde{x})]\tilde{A} &= (1-\mu_b) + r(1-\tilde{x})[(2+s)\mu_b - 1] \\ [1+s(1-\tilde{x})]\tilde{B} &= (1+s)\mu_b + r\tilde{x}[1 - (s+2)\mu_b] \\ [1+s(1-\tilde{x})]\tilde{C} &= (1+s)(1-\mu_b) + r\tilde{x}[(s+2)\mu_b - (s+1)] \\ [1+s(1-\tilde{x})]\tilde{D} &= \mu_b + r(1-\tilde{x})[(s+1) - (s+2)\mu_b]. \end{aligned} \quad (\text{S7.5})$$

When we multiply  $\mathbf{L}_{\text{ex}}^2$  by  $\mathbf{L}_{\text{ex}}^1$  we find that the product  $\mathbf{L}_{\text{ex}}$  has the following structure:

$$\mathbf{L}_{\text{ex}} = \begin{pmatrix} a & e & h & d \\ b & f & g & c \\ c & g & f & b \\ d & h & e & a \end{pmatrix}, \quad (\text{S7.6})$$

where

$$\begin{aligned}
a &= (1-m)^2 \tilde{A}\bar{A} + (1-m)^2 \tilde{B}\bar{D} + m^2 \tilde{C}\bar{A} + m^2 \tilde{D}\bar{D} \\
b &= (1-m)^2 \tilde{D}\bar{A} + (1-m)^2 \tilde{C}\bar{D} + m^2 \tilde{B}\bar{A} + m^2 \tilde{A}\bar{D} \\
c &= m(1-m) \left[ \tilde{A}\bar{A} + \tilde{B}\bar{D} + \tilde{C}\bar{A} + \tilde{D}\bar{D} \right] \\
d &= m(1-m) \left[ \tilde{D}\bar{A} + \tilde{C}\bar{D} + \tilde{B}\bar{A} + \tilde{A}\bar{D} \right] \\
e &= (1-m)^2 \tilde{A}\bar{B} + (1-m)^2 \tilde{B}\bar{C} + m^2 \tilde{C}\bar{B} + m^2 \tilde{D}\bar{C} \\
f &= (1-m)^2 \tilde{D}\bar{B} + (1-m)^2 \tilde{C}\bar{C} + m^2 \tilde{B}\bar{B} + m^2 \tilde{A}\bar{C} \\
g &= m(1-m) \left[ \tilde{A}\bar{B} + \tilde{B}\bar{C} + \tilde{C}\bar{B} + \tilde{D}\bar{C} \right] \\
h &= m(1-m) \left[ \tilde{D}\bar{B} + \tilde{C}\bar{C} + \tilde{B}\bar{B} + \tilde{A}\bar{C} \right].
\end{aligned} \tag{S7.7}$$

Let  $D(\lambda) = \det(\mathbf{L}_{\text{ex}} - \lambda \mathbf{I})$  be the characteristic polynomial of  $\mathbf{L}_{\text{ex}}$ . From (S7.6),  $D(\lambda)$  factors into  $2 \times 2$  determinants:

$$D(\lambda) = \begin{vmatrix} a+d-\lambda & e+h & 0 & 0 \\ b+c & f+g-\lambda & 0 & 0 \\ c & g & f-g-\lambda & b-c \\ d & h & e-h & a-d-\lambda \end{vmatrix}. \tag{S7.8}$$

Therefore  $D(\lambda)$  can be written

$$D(\lambda) = D_1(\lambda)D_2(\lambda), \tag{S7.9}$$

where

$$\begin{aligned}
D_1(\lambda) &= \lambda^2 - (a+d+f+g)\lambda + (a+d)(f+g) - (b+c)(e+h) \\
D_2(\lambda) &= \lambda^2 - (a-d+f-g)\lambda + (a-d)(f-g) - (b-c)(e-h).
\end{aligned} \tag{S7.10}$$

As  $0 < m < 1$  and  $\bar{A}, \bar{B}, \bar{C}, \bar{D}$  and  $\tilde{A}, \tilde{B}, \tilde{C}, \tilde{D}$  are all positive, the matrix  $\mathbf{L}_{\text{ex}}$  is a positive matrix and its largest eigenvalue in magnitude is positive. Observe that the discriminant of  $D_1(\lambda)$  is

$$(a+d+f+g)^2 - 4[(a+d)(f+g) - (b+c)(e+h)], \tag{S7.11}$$

which is positive and equal to

$$[(a+d) - (f+g)]^2 + 4(b+c)(e+h). \tag{S7.12}$$

In addition,  $(a+d+f+g)$  is positive. Therefore  $D_1(\lambda)$  has real roots, and its largest root in magnitude is positive. Thus this positive root is less than 1 if  $D_1(1) > 0$  and  $D_1'(1) > 0$ .

As the largest eigenvalue of  $\mathbf{L}_{\text{ex}}$  is positive, for stability of  $(\bar{\mathbf{x}}, \bar{\mathbf{y}})$  we require that if the eigenvalues associated with  $D_2(\lambda)$  are real and at least one is positive, they are both less than 1. Again the conditions for this are  $D_2(\lambda) > 0$  and  $D_2'(1) > 0$ . Observe that

$$\begin{aligned} D_1'(1) &= 2 - (a + d + f + g) \\ D_2'(1) &= 2 - (a - d + f - g) = D_1'(1) + 2(d + g) > D_1'(1). \end{aligned} \tag{S7.13}$$

In view of (S7.13), for the largest eigenvalue of  $\mathbf{L}_{\text{ex}}$  to be less than one, we require

$$D_1(1) > 0, \quad D_1'(1) > 0, \quad D_2(1) > 0. \tag{S7.14}$$

We now compute the constant terms of  $D_1(\lambda)$  and  $D_2(\lambda)$ . We already know, based on the properties of the matrices  $\mathbf{L}_{\text{ex}}^1$  and  $\mathbf{L}_{\text{ex}}^2$  that the constant terms of both  $D_1(\lambda)$  and  $D_2(\lambda)$  are the same and are equal to

$$(1 - 2m)^2 (\overline{A\overline{C}} - \overline{B\overline{D}}) (\tilde{A}\tilde{C} - \tilde{B}\tilde{D}). \tag{S7.15}$$

With the same technique used to compute (S4.10), we deduce that

$$(1 + s\bar{x})^2 (\overline{A\overline{C}} - \overline{B\overline{D}}) = (1 - 2\mu_b)(1 + s)(1 - r), \tag{S7.16}$$

and similarly

$$[1 + s(1 - \tilde{x})]^2 (\tilde{A}\tilde{C} - \tilde{B}\tilde{D}) = (1 - 2\mu_b)(1 + s)(1 - r). \tag{S7.17}$$

Therefore the constant terms of both  $D_1(\lambda)$  and  $D_2(\lambda)$  are the same and are equal to

$$(1 - 2m)^2 (1 - 2\mu_b)^2 (1 + s\bar{x})^{-2} [1 + s(1 - \tilde{x})]^{-2} (1 + s)^2 (1 - r)^2, \tag{S7.18}$$

which is positive, and so  $D_1(\lambda)$  has two positive roots. Also, as  $a, b, c, d$  are all positive,

$$\begin{aligned} D_2(1) &= 1 - (a - d + f - g) + (a - d)(f - g) - (b - c)(e - h) \\ &> 1 - (a + d + f + g) + (a + d)(f + g) - (b + c)(e + h) = D_1(1). \end{aligned} \tag{S7.19}$$

Hence for the symmetric equilibrium to be externally stable, we require that  $D_1(1)$  and  $D_1'(1)$  are both positive.

Now from (S6.5) we know that

$$(1 + s\bar{x})[1 + s(1 - \tilde{x})] = (1 + s) + sm_B[(s + 2)\bar{x} - 1]. \quad (S7.20)$$

As  $\bar{x} > \frac{1}{s+2}$  we have

$$(1 + s\bar{x})[1 + s(1 - \tilde{x})] > (1 + s). \quad (S7.21)$$

Thus the equal constant terms of  $D_1(\lambda)$  and  $D_2(\lambda)$  given in (S7.18) are positive and less than 1. As a result it is impossible for the two positive roots of  $D_1(\lambda)$  to both be larger than 1, and they are both less than 1 provided  $D_1(1) > 0$ . Hence the external stability of the symmetric equilibrium requires that

$$D_1(1) = 1 - (a + d + f + g) + (a + d)(f + g) - (b + c)(e + h) \quad (S7.22)$$

is positive (the last summand in (S7.22) is given in (S7.18)). We now compute  $a + d + f + g$ .

*Computation of  $(a + d + f + g)$*

We have

$$\begin{aligned} (a + d + f + g) &= \left[ (1 - m)^2 \tilde{A} + m^2 \tilde{C} + m(1 - m) (\tilde{B} + \tilde{D}) \right] \bar{A} \\ &\quad + \left[ (1 - m)^2 \tilde{C} + m^2 \tilde{A} + m(1 - m) (\tilde{B} + \tilde{D}) \right] \bar{C} \\ &\quad + \left[ (1 - m)^2 \tilde{B} + m^2 \tilde{D} + m(1 - m) (\tilde{A} + \tilde{C}) \right] \bar{D} \\ &\quad + \left[ (1 - m)^2 \tilde{D} + m^2 \tilde{B} + m(1 - m) (\tilde{A} + \tilde{C}) \right] \bar{B}. \end{aligned} \quad (S7.23)$$

As  $\bar{A}, \bar{B}, \bar{C}, \bar{D}$  and also  $\tilde{A}, \tilde{B}, \tilde{C}, \tilde{D}$  given in (S7.4) and (S7.5), respectively, are all linear functions of  $\mu_b$ , where  $0 \leq \mu_b \leq 1$ , we can represent them as  $\bar{A} = (1 - \mu_b)\bar{A}_0 + \mu_b\bar{A}_1$ , etc.

Hence

$$\begin{aligned} (1 + s\bar{x})\bar{A}_0 &= (1 + s)[1 - r(1 - \bar{x})] = (1 + s\bar{x})\bar{D}_1 \\ (1 + s\bar{x})\bar{B}_0 &= (1 + s)r\bar{x} = (1 + s\bar{x})\bar{C}_1 \\ (1 + s\bar{x})\bar{C}_0 &= 1 - r\bar{x} = (1 + s\bar{x})\bar{B}_1 \end{aligned} \quad (S7.24)$$

$$\begin{aligned} (1 + s\bar{x})\bar{D}_0 &= r(1 - \bar{x}) = (1 + s\bar{x})\bar{A}_1, \\ [1 + s(1 - \tilde{x})]\tilde{A}_0 &= 1 - r(1 - \tilde{x}) = [1 + s(1 - \tilde{x})]\tilde{D}_1 \\ [1 + s(1 - \tilde{x})]\tilde{B}_0 &= r\tilde{x} = [1 + s(1 - \tilde{x})]\tilde{C}_1 \\ [1 + s(1 - \tilde{x})]\tilde{C}_0 &= (1 + s)[1 - r\tilde{x}] = [1 + s(1 - \tilde{x})]\tilde{B}_1 \\ [1 + s(1 - \tilde{x})]\tilde{D}_0 &= (1 + s)r(1 - \tilde{x}) = [1 + s(1 - \tilde{x})]\tilde{A}_1. \end{aligned} \quad (S7.25)$$

Since

$$\begin{aligned} m_b &= m + \mu_b - 2m\mu_b = m(1 - \mu_b) + \mu_b(1 - m) \\ 1 - m_b &= 1 - m - \mu_b + 2m\mu_b = (1 - m)(1 - \mu_b), \end{aligned} \quad (S7.26)$$

we can write

$$\begin{aligned} (a + d + f + g) &= \left[ (1 - m)(1 - m_b)\tilde{A}_0 + (1 - m)m_b\tilde{D}_0 + m(1 - m_b)\tilde{B}_0 + m \cdot m_b\tilde{C}_0 \right] \bar{A} \\ &+ \left[ (1 - m)(1 - m_b)\tilde{C}_0 + (1 - m)m_b\tilde{B}_0 + m(1 - m_b)\tilde{D}_0 + m \cdot m_b\tilde{A}_0 \right] \bar{C} \\ &+ \left[ (1 - m)(1 - m_b)\tilde{B}_0 + (1 - m)m_b\tilde{C}_0 + m(1 - m_b)\tilde{A}_0 + m \cdot m_b\tilde{D}_0 \right] \bar{D} \\ &+ \left[ (1 - m)(1 - m_b)\tilde{D}_0 + (1 - m)m_b\tilde{A}_0 + m(1 - m_b)\tilde{C}_0 + m \cdot m_b\tilde{B}_0 \right] \bar{B}. \end{aligned} \quad (S7.27)$$

Substitute into (S7.27)

$$\begin{aligned} \bar{A} &= (1 - \mu_b)\bar{A}_0 + \mu_b\bar{D}_0, & \bar{B} &= (1 - \mu_b)\bar{B}_0 + \mu_b\bar{C}_0, \\ \bar{C} &= (1 - \mu_b)\bar{C}_0 + \mu_b\bar{B}_0, & \bar{D} &= (1 - \mu_b)\bar{D}_0 + \mu_b\bar{A}_0, \end{aligned} \quad (S7.38)$$

to obtain

$$\begin{aligned} (a + d + f + g) &= (1 - m_b)^2 \left[ \tilde{A}_0\bar{A}_0 + \tilde{B}_0\bar{D}_0 + \tilde{C}_0\bar{C}_0 + \tilde{D}_0\bar{B}_0 \right] \\ &+ m_b(1 - m_b) \left[ \left( \tilde{B}_0 + \tilde{D}_0 \right) (\bar{A}_0 + \bar{C}_0) + \left( \tilde{A}_0 + \tilde{C}_0 \right) (\bar{B}_0 + \bar{D}_0) \right] \\ &+ m_b^2 \left[ \tilde{A}_0\bar{C}_0 + \tilde{B}_0\bar{B}_0 + \tilde{C}_0\bar{A}_0 + \tilde{D}_0\bar{D}_0 \right]. \end{aligned} \quad (S7.29)$$

Equation (S7.29) can also be written as

$$\begin{aligned} (a + d + f + g) &= (1 - 2m_b) \left[ \tilde{A}_0\bar{A}_0 + \tilde{B}_0\bar{D}_0 + \tilde{C}_0\bar{C}_0 + \tilde{D}_0\bar{B}_0 \right] \\ &+ m_b \left[ \left( \tilde{B}_0 + \tilde{D}_0 \right) (\bar{A}_0 + \bar{C}_0) + \left( \tilde{A}_0 + \tilde{C}_0 \right) (\bar{B}_0 + \bar{D}_0) \right] \\ &+ m_b^2 \left[ \left( \tilde{A}_0 + \tilde{C}_0 \right) (\bar{A}_0 + \bar{C}_0) + \left( \tilde{B}_0 + \tilde{D}_0 \right) (\bar{B}_0 + \bar{D}_0) \right. \\ &\quad \left. - \left( \tilde{A}_0 + \tilde{C}_0 \right) (\bar{B}_0 + \bar{D}_0) + \left( \tilde{B}_0 + \tilde{D}_0 \right) (\bar{A}_0 + \bar{C}_0) \right], \end{aligned} \quad (S7.30)$$

or as

$$\begin{aligned} (a + d + f + g) &= (1 - 2m_b) \left[ \tilde{A}_0\bar{A}_0 + \tilde{B}_0\bar{D}_0 + \tilde{C}_0\bar{C}_0 + \tilde{D}_0\bar{B}_0 \right] \\ &+ m_b \left[ \left( \tilde{B}_0 + \tilde{D}_0 \right) (\bar{A}_0 + \bar{C}_0) + \left( \tilde{A}_0 + \tilde{C}_0 \right) (\bar{B}_0 + \bar{D}_0) \right] \\ &+ m_b^2 \left( \tilde{A}_0 + \tilde{C}_0 - \tilde{B}_0 - \tilde{D}_0 \right) (\bar{A}_0 + \bar{C}_0 - \bar{B}_0 - \bar{D}_0). \end{aligned} \quad (S7.31)$$

From (S7.24) and (S7.25),

$$\begin{aligned} (1 + s\bar{x})[1 + s(1 - \tilde{x})] \left[ \tilde{A}_0\bar{A}_0 + \tilde{B}_0\bar{D}_0 + \tilde{C}_0\bar{C}_0 + \tilde{D}_0\bar{D}_0 \right] &= \\ &= (1 + s) \left[ 2(1 - r) + r^2 \right] + r^2s(s + 1)\bar{x} - r^2s\tilde{x} - r^2s^2\bar{x}\tilde{x}, \end{aligned} \quad (S7.32)$$

$$\begin{aligned} (1 + s\bar{x})[1 + s(1 - \tilde{x})] \left[ \left( \tilde{B}_0 + \tilde{D}_0 \right) (\bar{A}_0 + \bar{C}_0) + \left( \tilde{A}_0 + \tilde{C}_0 \right) (\bar{B}_0 + \bar{D}_0) \right] &= \\ &= 2r^2(1 + s\bar{x})[1 + s(1 - \tilde{x})] + r(1 - r)(s + 2) [(s + 2) + s(\bar{x} - \tilde{x})], \end{aligned} \quad (S7.33)$$

$$\begin{aligned} (1 + s\bar{x})[1 + s(1 - \tilde{x})] \left( \tilde{A}_0 + \tilde{C}_0 - \tilde{B}_0 - \tilde{D}_0 \right) (\bar{A}_0 + \bar{C}_0 - \bar{B}_0 - \bar{D}_0) &= \\ &= (s + 2)^2 (1 - r)^2. \end{aligned} \quad (S7.34)$$

Remember that by (S7.18)

$$\begin{aligned} (1 + s\bar{x})^2 [1 + (1 - \tilde{x})]^2 [(a + d)(f + g) - (b + c)(e + h)] &= \\ &= (1 - 2m)^2 (1 - 2\mu_b)^2 (s + 1)^2 (1 - r)^2. \end{aligned} \quad (S7.35)$$

But

$$(1 - 2m)(1 - 2\mu_b) = 1 - 2(m + \mu_b - 2m\mu_b) = 1 - 2m_b. \quad (S7.36)$$

Therefore

$$\begin{aligned} (1 + s\bar{x})^2 [1 + (1 - \tilde{x})]^2 [(a + d)(f + g) - (b + c)(e + h)] &= \\ &= (1 - 2m_b)^2 (s + 1)^2 (1 - r)^2. \end{aligned} \quad (S7.37)$$

Combining all of this, we get that  $D_1(1) = 1 - (a + d + f + g) + (a + d)(f + g) - (b + c)(e + h)$ ,

which we compute as

$$\begin{aligned} 1 - (1 - 2m_b) \frac{(1 + s) \left[ 2(1 - r) + r^2 \right] + r^2s(s + 1)\bar{x} - r^2s\tilde{x} - r^2s^2\bar{x}\tilde{x}}{(1 + s\bar{x})[1 + s(1 - \tilde{x})]} & \\ - m_b \frac{2r^2(1 + s\bar{x})[1 + s(1 - \tilde{x})] + r(1 - r)(s + 2)[(s + 2) + s(\bar{x} - \tilde{x})]}{(1 + s\bar{x})[1 + s(1 - \tilde{x})]} & \\ - m_b^2 \frac{(s + 2)^2 (1 - r)^2}{(1 + s\bar{x})[1 + s(1 - \tilde{x})]} & \\ + \frac{(1 - 2m_b)^2 (s + 1)^2 (1 - r)^2}{(1 + s\bar{x})^2 [1 + s(1 - \tilde{x})]^2}. & \end{aligned} \quad (S7.38)$$

Observe that

$$r^2[(1 + s) + s(s + 1)\bar{x} - s\tilde{x} - s^2\bar{x}\tilde{x}] = r^2(1 + s\bar{x})[1 + s(1 - \tilde{x})], \quad (S7.39)$$

so (S7.38) simplifies to

$$\begin{aligned}
1 - r^2 - (1 - 2m_b) \frac{2(1+s)(1-r)}{(1+s\bar{x})[1+s(1-\tilde{x})]} - m_b \frac{r(1-r)(s+2)[(s+2)+s(\bar{x}-\tilde{x})]}{(1+s\bar{x})[1+s(1-\tilde{x})]} \\
- m_b^2 \frac{(s+2)^2(1-r)^2}{(1+s\bar{x})[1+s(1-\tilde{x})]} + \frac{(1-2m_b)^2(s+1)^2(1-r)^2}{(1+s\bar{x})^2[1+s(1-\tilde{x})]^2}.
\end{aligned} \tag{S7.40}$$

Clearly  $D_1(1)$  of (S7.40) has a factor of  $(1-r)$ , and in fact

$$D_1(1) = (1-r)f(r), \tag{S7.41}$$

where  $f(r)$  is a linear function of  $r$ , for  $0 \leq r \leq 1$ . Now

$$f(1) = 2 - (1 - 2m_b) \frac{2(1+s)}{(1+s\bar{x})[1+s(1-x)]} - m_b \frac{(s+2)[(s+2)+s(\bar{x}-\tilde{x})]}{(1+s\bar{x})[1+s(1-\tilde{x})]}. \tag{S7.42}$$

Following (S6.7) we have

$$(1+s\bar{x})[1+s(1-\tilde{x})] = (1+s) + sm_B[(s+2)\bar{x} - 1]. \tag{S7.43}$$

We also have an equivalent expression for (S7.43) in terms of  $\tilde{x}$ , namely

$$(1+s\bar{x})[1+s(1-\tilde{x})] = (1+s) + sm_B[(s+1) - (s+2)\tilde{x}]. \tag{S7.44}$$

Also, whereas  $\bar{x} > \frac{1}{s+2}$ , we have  $\tilde{x} < \frac{s+1}{s+2}$ . Applying all of this to (S7.42) and using the fact that

$$(1+s\bar{x})[1+s(1-\tilde{x})] = (1+s) + \frac{1}{2}sm_B[s + (s+2)(\bar{x}-\tilde{x})], \tag{S7.45}$$

we get that

$$\begin{aligned}
(1+s\bar{x})[1+s(1-\tilde{x})]f(1) &= 2(s+1) + sm_B[s + (s+2)(\bar{x}-\tilde{x})] \\
&\quad - 2(1-2m_b)(s+1) - m_b(s+2)[(s+2)+s(\bar{x}-\tilde{x})] \\
&= s^2m_B - m_b \left[ (s+2)^2 - 4(s+1) \right] + s(s+2)(m_B - m_b)(\bar{x}-\tilde{x}) \\
&= s^2(m_B - m_b) + s(s+2)(m_B - m_b)(\bar{x}-\tilde{x}).
\end{aligned} \tag{S7.46}$$

Thus

$$(1+s\bar{x})[1+s(1-\tilde{x})]f(1) = s(m_B - m_b)[s + (s+2)(\bar{x}-\tilde{x})]. \tag{S7.47}$$

But as  $(s+2)\bar{x} > 1$ ,  $(s+2)\tilde{x} < (s+1)$ ,

$$s + (s+2)(\bar{x} - \tilde{x}) = [(s+2)\bar{x} - 1] + [(s+1) - (s+2)\tilde{x}] > 0. \quad (S7.48)$$

It follows that the sign of  $f(1)$  is the same as the sign of  $(m_B - m_b)$ .

We now compute  $f(0)$ :

$$\begin{aligned} f(0) = 1 - (1 - 2m_b) \frac{2(1+s)}{(1+s\bar{x})[1+s(1-\tilde{x})]} - m_b^2 \frac{(s+2)^2}{(1+s\bar{x})[1+s(1-\tilde{x})]} \\ + \frac{(1-2m_b)^2 (s+1)^2}{(1+s\bar{x})^2 [1+s(1-\tilde{x})]^2}. \end{aligned} \quad (S7.49)$$

Using the expression (S7.43) for the product of the two mean fitnesses, we get

$$\begin{aligned} (1+s\bar{x})^2 [1+s(1-\tilde{x})]^2 f(0) = \{(1+s) + sm_B [(s+2)\bar{x} - 1]\}^2 \\ - 2(1-2m_b)(s+1) \{(1+s) + sm_B [(s+2)\bar{x} - 1]\} \\ - m_b^2 (s+2) \{(1+s) + sm_B [(s+2)\bar{x} - 1]\} \\ + (1-2m_b)^2 (s+1)^2. \end{aligned} \quad (S7.50)$$

In (S7.50) we replace the  $\bar{x}^2$  term using the equilibrium equation (36) to give

$$\begin{aligned} (1+s\bar{x})^2 [1+s(1-\tilde{x})]^2 f(0) = (m_B - m_b)s \{ m_b s(s+1) \\ - m_B^2 (s+2)^2 + m_B [(s+1)(s+4) - m_b (s+2)^2] \\ + m_B (s+2)\bar{x} [m_B (s+2)^2 + m_b (s+2)^2 - 4(s+1)] \}. \end{aligned} \quad (S7.51)$$

The right-hand side of (S7.51) is  $(m_B - m_b)s$  multiplied by

$$m_b s(s+1) + m_B (s+2)^2 (m_B + m_b) [\bar{x}(s+2) - 1] + m_B (s+1) [(s+4) - 4\bar{x}(s+2)]. \quad (S7.52)$$

We will show that (S7.52) is always positive. In fact, (S7.52) is equal to

$$\begin{aligned} m_b s(s+1) + m_B \cdot m_b (s+2)^2 [\bar{x}(s+2) - 1] + m_B^2 (s+2)^2 [\bar{x}(s+2) - 1] \\ + m_B (s+1) [(s+4) - 4\bar{x}(s+2)]. \end{aligned} \quad (S7.53)$$

From the equilibrium equation (36) we get that

$$m_B [(s+2)\bar{x} - 1] = s\bar{x}^2 + 2\bar{x} - 1. \quad (S7.54)$$



Hence (S7.53) is equal to

$$\begin{aligned}
& m_b s(s+1) + m_B \cdot m_b (s+2)^2 [\bar{x}(s+2) - 1] + \\
& + m_B (s+2)^2 [s\bar{x}^2 + 2\bar{x} - 1] + m_B(s+1)[(s+4) - 4\bar{x}(s+2)].
\end{aligned} \tag{S7.55}$$

The last two terms have a factor  $m_B$  that multiplies

$$\begin{aligned}
& (s+1)(s+4) - (s+2)^2 + (s+2)^2 \bar{x}(2+s\bar{x}) - 4\bar{x}(s+1)(s+2) = \\
& = s + (s+2)\bar{x}[(s+2)(2+s\bar{x}) - 4(s+1)] \\
& = s + (s+2)\bar{x}[(s+2)s\bar{x} - 2s] \\
& = s \left[ (s+2)^2 \bar{x}^2 - 2(s+2)\bar{x} + 1 \right] = s[(s+2)\bar{x} - 1]^2,
\end{aligned} \tag{S7.56}$$

which is positive. To sum up,  $f(0)$  also has the same sign of  $(m_B - m_b)$ , and so

$$D_1(1) = (1-r)s(m_B - m_b)\Delta(r), \tag{S7.57}$$

where  $\Delta(r)$  is a linear function of  $r$  that is positive for all  $0 \leq r \leq 1$ . As  $(m_B - m_b) = (1 - 2m)(\mu_B - \mu_b)$ , this proves the following result.
